# Supplementary material for: Homology modeling of major intrinsic proteins in rice, maize and Arabidopsis: comparative analysis of transmembrane helix association and aromatic/arginine selectivity filters
Source: PubMed Central journal article supplement (PMC1866351; doi:10.1186/1472-6807-7-27), 2007-04-19
Supplement: 1472-6807-7-27-S1.pdf [file 1472-6807-7-27-S1.pdf]

## Structure-based sequence alignment of TM1

Helix 1 PIP

|          |    |                             |    |
|----------|----|-----------------------------|----|
| 1J4N     | 10 | FWRAVVAEFLAMILFIFISIGSALGF  | 35 |
| 1FX8     | 7  | LKGQCIAEFLGTGLLIFFGVGCVAAL  | 32 |
| 1RC2     | 1  | MFRKLAEECFGTFWLVFGGCGSAVLA  | 26 |
| 1Z98     | 37 | FWRAAIAEFIATLLFLYITVATVIGH  | 62 |
| 2B60     | 9  | FWRAIFAEFFATLFYVFFGLGASLRW  | 34 |
| 2F2B     | 4  | LTKRCIAEFIGTFILVFFGAGSAAVT  | 29 |
| OsPIP1;1 |    | FYRAGIAEFVATFLFLYITILTVMGV  |    |
| OsPIP1;2 |    | FYRAGIAEFMATFLFLYITVLTVMGV  |    |
| OsPIP1;3 |    | FYRAGIAEFVATFLFLYISILTVMGV  |    |
| OsPIP1;4 |    | FYRAGIADFVATFLFLYITILTVMGV  |    |
| OsPIP1;5 |    | FYRAGIAEFMATFLFLYITVLTVMGV  |    |
| OsPIP2;1 |    | LYRAVIAEFIATLLFLYITVATVIGY  |    |
| OsPIP2;2 |    | LYRAVIAEFIATLLFLYITVATVIGY  |    |
| OsPIP2;3 |    | LYRAVIAEFVATLLFLYITVATVIGY  |    |
| OsPIP2;4 |    | LYRALIAEFVATLLFLYVTVATVIGY  |    |
| OsPIP2;5 |    | LYRAVIAEFVATLLFLYVTVATVIGY  |    |
| OsPIP2;6 |    | FYRALIAEFIATLLFLYITVATVIGY  |    |
| OsPIP2;7 |    | LYRALIAEFMATLIFLYVSIATVIGY  |    |
| OsPIP2;8 |    | LYRAAIAEFTATLLLVCSVSTVIGE   |    |
| ZmPIP1;1 |    | FYRPGIAEFVATFLFLYISILTVMGV  |    |
| ZmPIP1;2 |    | FYRAGIAEFVATFLFLYITILTVMGV  |    |
| ZmPIP1;3 |    | FYRAGIAEFVATFLFLYITVLTVMGV  |    |
| ZmPIP1;4 |    | FYRAGIAEFVATFLFLYITVLTVMGV  |    |
| ZmPIP1;5 |    | FYRAGIAEFVATFLFLYISILTVMGV  |    |
| ZmPIP1;6 |    | FYRAGIAEFVATFLFLYVTVLTVMGV  |    |
| ZmPIP2;1 |    | LYRAVIAEFIATLLFLYITVATVIGY  |    |
| ZmPIP2;2 |    | LYRAVIAEFIATLLFLYVTVATVIGY  |    |
| ZmPIP2;3 |    | LYRAVIAEFIATLLFLYITVATVIGY  |    |
| ZmPIP2;4 |    | LYRAVIAEFIATLLFLYITVATVIGY  |    |
| ZmPIP2;5 |    | LYRAVIAEFVATLLFLYITVATVIGY  |    |
| ZmPIP2;6 |    | LYRAVIAEFVATLLFLYITVATVIGY  |    |
| ZmPIP2;7 |    | LYRAAIAEFIATLLFLYITVLTIIIGY |    |
| AtPIP1;1 |    | FWRAGIAEFIATFLFLYITVLTVMGV  |    |
| AtPIP1;2 |    | FWRAGIAEFIATFLFLYITVLTVMGV  |    |
| AtPIP1;3 |    | FYRAGIAEFIATFLFLYITVLTVMGV  |    |
| AtPIP1;4 |    | FYRAGIAEFIATFLFLYITVLTVMGV  |    |
| AtPIP1;5 |    | FYRAGIAEFIATFLFLYVTVLTVMGV  |    |
| AtPIP2;1 |    | FYRAVIAEFVATLLFLYITVLTVIGY  |    |
| AtPIP2;2 |    | LYRAVIAEFVATLLFLYITVLTVIGY  |    |
| AtPIP2;3 |    | LYRAVIAEFVATLLFLYVTVLTVIGY  |    |
| AtPIP2;4 |    | LYRAVIAEFVATLLFLYVSILTIGY   |    |
| AtPIP2;5 |    | FYRALIAEFIATLLFLYVTIMTVIGY  |    |
| AtPIP2;6 |    | FYRAVIAEFIATLLFLYVTVLTVIGF  |    |
| AtPIP2;7 |    | FYRALIAEFIATLLFLYVTVATVIGH  |    |
| AtPIP2;8 |    | FYRAIIAEFIATLLFLYVTVATVIGH  |    |

Helix1 TIP

|          |    |                             |    |
|----------|----|-----------------------------|----|
| 1J4N     | 10 | FWRVVAEFLAMILFIFISIGSALGF   | 35 |
| 1FX8     | 7  | LKGQCIAEFLGTGLLIFFGVGCVAAL  | 32 |
| 1RC2     | 1  | MFRKLAEEFCGTFWLVFGGCGSAVLA  | 26 |
| 1Z98     | 37 | FWRAAIAEFIATLLFLYITVATVIGH  | 62 |
| 2B6O     | 9  | FWRAIFAEFFATLFYVFFGLGASLRW  | 34 |
| 2F2B     | 4  | LTKRCIAEFIGTFILVFFGAGSAAVT  | 29 |
| OsTIP1;1 |    | ALKAALAEFISTLIFVFAGQGSMAF   |    |
| OsTIP1;2 |    | TAKAAVAEFISMLIFVFAGSGSMAF   |    |
| OsTIP2;1 |    | SVKAYVAEFIATLLFVFAGVGSIAIY  |    |
| OsTIP2;2 |    | SLKAYVAEFISTLVFVFAGVGSIAIY  |    |
| OsTIP2;3 |    | SIKAYVAEFIATLLFVFAGVGSIAIY  |    |
| OsTIP3;1 |    | TIRAAISEFLATAIFVFAAEGSILSL  |    |
| OsTIP3;2 |    | ATRAALSEFVATAVVFVFAAEGSVYGL |    |
| OsTIP4;1 |    | CVRAVLAELVLTFLVFVFTGVAATMAA |    |
| OsTIP4;2 |    | CLRAVAGELLFTFLFVFIGVASTITA  |    |
| OsTIP4;3 |    | CLRAVVAELLLTFLFVFSGVGSAMAA  |    |
| OsTIP5;1 |    | ALRAYFAEFFSTFLFVFIAVGSTISA  |    |
| ZmTIP1;1 |    | ALKAFAEFISTLIFVFAGQGSMAF    |    |
| ZmTIP1;2 |    | TAKAAVAEFISTLIFVFAGSGSMAF   |    |
| ZmTIP2;1 |    | SIKAYVAEFIATLLFVFAGVGSIAIY  |    |
| ZmTIP2;2 |    | SIKAYVAEFIATLLFVFAGVGSIAIY  |    |
| ZmTIP2;3 |    | SLKAYVAEFIATLLFVFAGVGSIAIY  |    |
| ZmTIP3;1 |    | TIRAAISEFIATAIFVFAAEGSVLSL  |    |
| ZmTIP4;1 |    | CVRAVLAELVLTFLFVFTGVSAAMAA  |    |
| ZmTIP4;2 |    | CVRAVLAELVLTFLFVFTGVSAAMAA  |    |
| ZmTIP4;3 |    | FFRGVLGELVLTFLFVFIGVGAAMTD  |    |
| ZmTIP4;4 |    | CVRAVLAELILTFLFVFAGVGSAMAT  |    |
| ZmTIP5;1 |    | SLRSYLAEFISTFLFVFTAVGSAISA  |    |
| AtTIP1;1 |    | ALKAALAEFISTLIFVAGSGSMAF    |    |
| AtTIP1;2 |    | ALRAALAEFISTLIFVFAGSGSGIAF  |    |
| AtTIP1;3 |    | AIRAAFAEFFSMVIFVFAGQGSMAF   |    |
| AtTIP2;1 |    | SLRAYLAEFISTLLFVFAGVGSIAIY  |    |
| AtTIP2;2 |    | SLKAYLSEFIATLLFVFAGVGSALAF  |    |
| AtTIP2;3 |    | SLKAYLSEFIATLLFVFAGVGSAAAF  |    |
| AtTIP3;1 |    | SIRATLAEFLSTFVVFVFAAEGSILSL |    |
| AtTIP3;2 |    | SIRATLAEFLSTFVVFVFAAEGSILAL |    |
| AtTIP4;1 |    | CIKALIVEFITTFVVFAGVGSAMAT   |    |
| AtTIP5;1 |    | ALRCYVSEFISTFFFVLAAVGSVMSS  |    |

Helix1 NIP

|          |    |                             |    |
|----------|----|-----------------------------|----|
| 1J4N     | 10 | FWRAVVAEFLAMILFIFISIGSALGF  | 35 |
| 1FX8     | 7  | LKGQCIAEFLGTGLLIFFGVCVAAL   | 32 |
| 1RC2     | 1  | MFRKLAEEFCFTFWLVFGGCGSAVLA  | 26 |
| 1Z98     | 37 | FWRAAIAEFIATLLFLYITVATVIGH  | 62 |
| 2B6O     | 9  | FWRAIFAEFFATLFYVFFGLGASLRW  | 34 |
| 2F2B     | 4  | LTKRCIAEFIGTFILVFFGAGSAAVT  | 29 |
| OsNIP1;1 |    | FIQKIIAEIFGTYFLIFAGCGAVTIN  |    |
| OsNIP1;2 |    | KNLLILAEILGTYFMIFAGCGAVVVN  |    |
| OsNIP1;3 |    | FAQKVIAEILGTFLLIFAGCAAVAVN  |    |
| OsNIP1;4 |    | FLQMLLAEFLATFFLMFAGLGAITVE  |    |
| OsNIP1;5 |    | FMQKILTEILGTYFMIFAGCGAVVVN  |    |
| OsNIP2;1 |    | LLKKVVSEVVATFLLVFMTCGAAGIS  |    |
| OsNIP2;2 |    | LLKKVISEVVATFLLVFTCGAASIY   |    |
| OsNIP3;1 |    | LHVCLGAEFVGTFILIFFATAAPIVN  |    |
| OsNIP3;2 |    | LVKKVGAEFFGTFTLIFTVLSTIIMD  |    |
| OsNIP3;3 |    | LLKKVSAEFFGTFILIFTVLSTIIMD  |    |
| OsNIP3;4 |    | LAKKAAAEFVGTFILIFAMLSTIVTD  |    |
| OsNIP3;5 |    | LVKKAAAEFIGTFILVFTVLSTVVM   |    |
| OsNIP4;1 |    | LIREVMVEGLASFLVFWSCVAALMQ   |    |
| ZmNIP1;1 |    | FIQKIIAEIFGTYFLMFAGCGAVTIN  |    |
| ZmNIP2;1 |    | LLKKVVSEVVSTFLLVFTCGAAGIY   |    |
| ZmNIP2;2 |    | LGKKVISEVVATFLLVFTCGAASIY   |    |
| ZmNIP3;1 |    | LTRKLGAEFVGTFILIFFATAAPIVN  |    |
| AtNIP1;1 |    | FLQKLLAEFLGTYFLVFTGCASVVVN  |    |
| AtNIP1;2 |    | FLQKLLAEVLGTYFLIFAGCAAVAVN  |    |
| AtNIP2;1 |    | FLQKLLAELVGTYYLIFAGCAAIAVN  |    |
| AtNIP3;1 |    | FVQKLIGEFVGTFTMIFAGCSAIVVN  |    |
| AtNIP4;1 |    | LTQKLLAEMIGTYFIVFSGCGVVVVN  |    |
| AtNIP4;2 |    | LTQKLLAEMIGTYFIIIFSGCGVVVVN |    |
| AtNIP5;1 |    | LTRKLGAEFVGTFILIFTATAGPIVN  |    |
| AtNIP6;1 |    | LYRKLGAEFVGTLLILIFAGTATAIVN |    |
| AtNIP7;1 |    | PLRIVMAELVGTFILMFSVCGVISST  |    |

Helix1 SIP

|          |    |                             |    |
|----------|----|-----------------------------|----|
|          | 10 |                             | 35 |
| 1J4N     | 10 | FWRAVVAEFLAMILFIFISIGSALGF  | 35 |
| 1FX8     | 7  | LKGQCIAEFLGTGLLIFFGVCVAAL   | 32 |
| 1RC2     | 1  | MFRKLAEEFCFTFWLVFGGCGSAVLA  | 26 |
| 1Z98     | 37 | FWRAAIAEFIATLLFLYITVATVIGH  | 62 |
| 2B6O     | 9  | FWRAIFAEFFATLFYVFFGLGASLRW  | 34 |
| 2F2B     | 4  | LTKRCIAEFIGTFILVFFGAGSAAVT  | 29 |
| OsSIP1;1 |    | AVRAAAAADAAVTFLWVLCVSTLGAST |    |
| OsSIP2;1 |    | RPWLVVGDLVVAAMWVCAGALVKLAV  |    |
| ZmSIP1;1 |    | TVRAAAAADAVVTFLWVLCASALGAST |    |
| ZmSIP1;2 |    | ALRAAAAADAVVTFLWVLCVSTLGAST |    |
| ZmSIP2;1 |    | RPWLVVGDLLALAAAWVCAGALVKLLV |    |
| AtSIP1;1 |    | VLKSAIGDMLMTFSWVVLATFGIQT   |    |
| AtSIP1;2 |    | AVKSALGDMVITFLWVILSATFGIQT  |    |
| AtSIP2;1 |    | RIGLVVTDLVLSFMWIWAGVLVNILV  |    |
