# Supplementary material for: Homology modeling of major intrinsic proteins in rice, maize and Arabidopsis: comparative analysis of transmembrane helix association and aromatic/arginine selectivity filters
Source: PubMed Central journal article supplement (PMC1866351; doi:10.1186/1472-6807-7-27), 2007-04-19
Supplement: 1472-6807-7-27-S2.pdf [file 1472-6807-7-27-S2.pdf]

## Structure-based sequence alignment of TM2

Helix 2 PIP

|          |    |                                              |    |
|----------|----|----------------------------------------------|----|
| 1J4N     | 50 | DNVKVS <b>L</b> A <b>F</b> GLSIATLAQSVGH     | 71 |
| 1FX8     | 40 | GQWEISVI <b>W</b> GLGVAMAIYLTAG              | 61 |
| 1RC2     | 35 | GFAGVALA <b>F</b> GLTVLTMAFAVGH              | 56 |
| 1Z98     | 73 | GLLGIAWA <b>F</b> GGMIFVLVYCTAG              | 94 |
| 2B6O     | 40 | HVLQVALA <b>F</b> GLALATLVQAVGH              | 61 |
| 2F2B     | 54 | DWVAIGLA <b>F</b> GF <del>A</del> IAASIYALGN | 75 |
| OsPIP1;1 |    | GIQGIAWS <b>F</b> GGMIFALVYCTAG              |    |
| OsPIP1;2 |    | GIQGIAWS <b>F</b> GGMIFALVYCTAG              |    |
| OsPIP1;3 |    | GIQGIAWS <b>F</b> GGMIFALVYCTAG              |    |
| OsPIP1;4 |    | GIQGIPWS <b>F</b> GS <b>M</b> IFALVYCTAG     |    |
| OsPIP1;5 |    | GIQGIAWS <b>F</b> GGMIFALVYCTAG              |    |
| OsPIP2;1 |    | GVLGIAWA <b>F</b> GGMIFILVYCTAG              |    |
| OsPIP2;2 |    | GILGIAWA <b>F</b> GGMIFILVYCTAG              |    |
| OsPIP2;3 |    | GILGIAWA <b>F</b> GGMIFILVYCTAG              |    |
| OsPIP2;4 |    | GVLGIAWA <b>F</b> GGMIFILVYCTAG              |    |
| OsPIP2;5 |    | GVLGIAWA <b>F</b> GGMIFILVYCTAG              |    |
| OsPIP2;6 |    | GTLGIAWA <b>F</b> GGMIFILVYCTAG              |    |
| OsPIP2;7 |    | GYLGVAWS <b>F</b> GATIFVLVYCTGG              |    |
| OsPIP2;8 |    | GVLGIAWA <b>F</b> GG <b>L</b> IFVLVYCTAG     |    |
| ZmPIP1;1 |    | GIQGIAWS <b>F</b> GGMILALVYCTAG              |    |
| ZmPIP1;2 |    | GIQGIAWS <b>F</b> GGMIFALVYCTAG              |    |
| ZmPIP1;3 |    | GIQGIAWS <b>F</b> GGMIFALVYCTAG              |    |
| ZmPIP1;4 |    | GIQGIAWS <b>F</b> GGMIFALVYCTAG              |    |
| ZmPIP1;5 |    | GIQGIAWS <b>F</b> GGMIFALVYCTAG              |    |
| ZmPIP1;6 |    | GIQGIAWA <b>F</b> GGMIFALVYCTAG              |    |
| ZmPIP2;1 |    | GVLGIAWA <b>F</b> GGMIFVLVYCTAG              |    |
| ZmPIP2;2 |    | GVLGIAWA <b>F</b> GGMIFVLVYCTAG              |    |
| ZmPIP2;3 |    | GILGIAWA <b>F</b> GGMIFILVYCTAG              |    |
| ZmPIP2;4 |    | GILGIAWA <b>F</b> GGMIFILVYCTAG              |    |
| ZmPIP2;5 |    | GVLGIAWA <b>F</b> GGMIFILVYCTAG              |    |
| ZmPIP2;6 |    | GILGIAWA <b>F</b> GGMIFILVYCTAG              |    |
| ZmPIP2;7 |    | GILGIAWA <b>F</b> GGMIFILVYCTAG              |    |
| AtPIP1;1 |    | GIQGIAWA <b>F</b> GGMIFALVYCTAG              |    |
| AtPIP1;2 |    | GIQGIAWA <b>F</b> GGMIFALVYCTAG              |    |
| AtPIP1;3 |    | GIQGIAWA <b>F</b> GGMIFALVYCTAG              |    |
| AtPIP1;4 |    | GIQGIAWA <b>F</b> GGMIFALVYCTAG              |    |
| AtPIP1;5 |    | GIQGIAWA <b>F</b> GGMIFALVYCTAG              |    |
| AtPIP2;1 |    | GILGIAWA <b>F</b> GGMIFILVYCTAG              |    |
| AtPIP2;2 |    | GILGIAWA <b>F</b> GGMIFILVYCTAG              |    |
| AtPIP2;3 |    | GILGIAWA <b>F</b> GGMIFILVYCTAG              |    |
| AtPIP2;4 |    | GILGIAWA <b>F</b> GGMIFVLVYCTAG              |    |
| AtPIP2;5 |    | GVLGIAWA <b>F</b> GGMIFILVYCTAG              |    |
| AtPIP2;6 |    | GLLGISWA <b>F</b> GGMIFILVYCTAG              |    |
| AtPIP2;7 |    | GLLGIAWA <b>F</b> GGMIFVLVYCTAG              |    |
| AtPIP2;8 |    | GLLGIAWA <b>F</b> GGMIFVLVYCTAG              |    |

Helix 2 TIP

|          |    |                                                  |    |
|----------|----|--------------------------------------------------|----|
| 1J4N     | 50 | DNVKVSLA <b>F</b> GLSIATLAQSVGH                  | 71 |
| 1FX8     | 40 | GQWEISVI <b>W</b> GLGVAMAIYLTAG                  | 61 |
| 1RC2     | 35 | GFAGVALA <b>F</b> GLTVLTMAFAVGH                  | 56 |
| 1Z98     | 73 | LLGIAWA <b>F</b> GGMIFVLVYCTAG                   | 94 |
| 2B60     | 40 | HVLQVALA <b>F</b> GLALATLVQAVGH                  | 61 |
| 2F2B     | 54 | DWVAIGLA <b>F</b> GFAlAASIYALGN                  | 75 |
| OsTIP1;1 |    | GLIAAAVA <b>H</b> AFALFVAVSVGAN                  |    |
| OsTIP1;2 |    | GLIAASLA <b>H</b> ALALFVAVAVGAN                  |    |
| OsTIP2;1 |    | GLVAIAIA <b>H</b> ALALFVGVSVAAAN                 |    |
| OsTIP2;2 |    | GLVAVAV <b>C</b> HGFGLFVAVAIGAN                  |    |
| OsTIP2;3 |    | GLVAIAIA <b>H</b> AFALFVGVSMAN                   |    |
| OsTIP3;1 |    | GLVAVSLA <b>H</b> ALALAVAVAVAVN                  |    |
| OsTIP3;2 |    | GLLVAVAV <b>H</b> ALALAAAVAVSRN                  |    |
| OsTIP4;1 |    | ALAGVAIA <b>T</b> ALAAGVLVTAGFH                  |    |
| OsTIP4;2 |    | AVTAAAMA <b>Q</b> ALVVAVLATAGFH                  |    |
| OsTIP4;3 |    | GLTAVAAA <b>H</b> ALVVAVMVSAGLH                  |    |
| OsTIP5;1 |    | SLMATAVA <b>Q</b> AFGLFAAVFIAAD                  |    |
| ZmTIP1;1 |    | GLIAAAVA <b>H</b> AFALFVAVSVGAN                  |    |
| ZmTIP1;2 |    | GLIAASLA <b>H</b> ALALFVAVSVGAN                  |    |
| ZmTIP2;1 |    | GLVAIAIA <b>H</b> ALALFVGVSVAAAN                 |    |
| ZmTIP2;2 |    | GLVAIAVA <b>H</b> ALALFVGVSVAAAN                 |    |
| ZmTIP2;3 |    | GLVAIAIA <b>H</b> AFALFVGVSMAN                   |    |
| ZmTIP3;1 |    | GLVAVALA <b>H</b> ALALAVAVAVAVN                  |    |
| ZmTIP4;1 |    | TLAAVAIA <b>H</b> ALAAGVLVTAGFH                  |    |
| ZmTIP4;2 |    | TLAAVAIA <b>H</b> ALAAGVLVTAGFH                  |    |
| ZmTIP4;3 |    | DLTAVAL <b>Q</b> ALVVAVIATAGFH                   |    |
| ZmTIP4;4 |    | GLTAVALA <b>H</b> TLVVAVMVSAGLH                  |    |
| ZmTIP5;1 |    | PLVATAVA <b>Q</b> AFGLFAAVLIAAD                  |    |
| AtTIP1;1 |    | GLVAAA <b>V</b> A <b>H</b> AFGLFVAVSVGAN         |    |
| AtTIP1;2 |    | GLVAAA <b>L</b> A <b>H</b> AFGLFVAVSVGAN         |    |
| AtTIP1;3 |    | GLVAA <b>S</b> L <b>S</b> <b>H</b> AFALFVAVSVGAN |    |
| AtTIP2;1 |    | GLVAIA <b>V</b> <b>C</b> HGFALFVAVAIGAN          |    |
| AtTIP2;2 |    | GLVAVAVA <b>H</b> AFALFVGVSIAN                   |    |
| AtTIP2;3 |    | GLVAIAIA <b>H</b> AFALFVGVSIAN                   |    |
| AtTIP3;1 |    | GLLILVALA <b>H</b> AFALFAAVSAAIN                 |    |
| AtTIP3;2 |    | GLVLVALA <b>H</b> ALALFAAVSAAIN                  |    |
| AtTIP4;1 |    | GLFAVAVA <b>H</b> AFVVAVMISAG-H                  |    |
| AtTIP5;1 |    | GVLIPAI <b>A</b> NALALSSSVYISWN                  |    |

Helix 2 NIP

|          |    |                                  |    |
|----------|----|----------------------------------|----|
| 1J4N     | 50 | DNVKVSLA <b>F</b> GLSIATLAQSVGH  | 71 |
| 1FX8     | 40 | GQWEISVI <b>W</b> GLGVAMAIYLTAG  | 61 |
| 1RC2     | 35 | GFAGVALA <b>F</b> GTLVLTMAFAVGH  | 56 |
| 1Z98     | 73 | GLLGIAWA <b>F</b> GGMIFVLVYCTAG  | 94 |
| 2B6O     | 40 | HVLQVALA <b>F</b> GLALATLVQAVGH  | 61 |
| 2F2B     | 54 | DWVAIGLA <b>F</b> GF AIAASIYALGN | 75 |
| OsNIP1;1 |    | TFPGVAIV <b>W</b> GLAVMVMVYAVGH  |    |
| OsNIP1;2 |    | TFPGICAV <b>W</b> GLVVMVLVYTVSH  |    |
| OsNIP1;3 |    | TFPGICIT <b>W</b> GLAVMVMVYSVGH  |    |
| OsNIP1;4 |    | TFPGVAVAW <b>G</b> AAVMAMVYAVGH  |    |
| OsNIP1;5 |    | MFPGICVV <b>W</b> GLVVTVLVYSVGH  |    |
| OsNIP2;1 |    | SQLGQSI <b>A</b> GGLIVTVMYAVGH   |    |
| OsNIP2;2 |    | SQLGQSV <b>V</b> GGLIVTVMYATGH   |    |
| OsNIP3;1 |    | SPFGNAAC <b>A</b> GLAVTTIILSTGH  |    |
| OsNIP3;2 |    | SLLGIATS <b>A</b> GLAVTVLVSLIH   |    |
| OsNIP3;3 |    | TLLGIATS <b>A</b> GLAVTVLVSLIH   |    |
| OsNIP3;4 |    | GLVGVAAS <b>I</b> GLAVAVLVMSLAH  |    |
| OsNIP3;5 |    | TLVGVAAS <b>A</b> GLAVVAVVLSVVH  |    |
| OsNIP4;1 |    | GTLTFPMV <b>C</b> LVVAMTVAFVLSW  |    |
| ZmNIP1;1 |    | TFPGVAIV <b>W</b> GLAVMVMVYAVGH  |    |
| ZmNIP2;1 |    | SQLGQSV <b>A</b> GGLIVTVMYAVGH   |    |
| ZmNIP2;2 |    | SQLGQSV <b>A</b> GGLIVTVMYATGH   |    |
| ZmNIP3;1 |    | SPFGNAAC <b>A</b> GLAVATVILSTGH  |    |
| AtNIP1;1 |    | TLPGIAIV <b>W</b> GLTIMVLIYSLGH  |    |
| AtNIP1;2 |    | TLPGIAIV <b>W</b> GLTVMVLVYSLGH  |    |
| AtNIP2;1 |    | TLVGIAV <b>V</b> WGIVIMVLVYCLGH  |    |
| AtNIP3;1 |    | TLPGIAL <b>V</b> WGLVVTVMYISIGH  |    |
| AtNIP4;1 |    | TFPGICV <b>T</b> WGLIVMVMYISTGH  |    |
| AtNIP4;2 |    | TFPGICV <b>T</b> WGLIVMVMYISTGH  |    |
| AtNIP5;1 |    | TLIGNAAC <b>A</b> GLAVMIIILSTGH  |    |
| AtNIP6;1 |    | TLIGCAAS <b>A</b> GLAVMIVILSTGH  |    |
| AtNIP7;1 |    | GLLEYAV <b>T</b> AGLSVVVVVYSIGH  |    |

Helix 2 SIP

|          |    |                                  |    |
|----------|----|----------------------------------|----|
| 1J4N     | 50 | DNVKVSLA <b>F</b> GLSIATLAQSVGH  | 71 |
| 1FX8     | 40 | GQWEISVI <b>W</b> GLGVAMAIYLTAG  | 61 |
| 1RC2     | 35 | GFAGVALA <b>F</b> GTLVLTMAFAVGH  | 56 |
| 1Z98     | 73 | GLLGIAWA <b>F</b> GGMIFVLVYCTAG  | 94 |
| 2B6O     | 40 | HVLQVALA <b>F</b> GLALATLVQAVGH  | 61 |
| 2F2B     | 54 | DWVAIGLA <b>F</b> GF AIAASIYALGN | 75 |
| OsSIP1;1 |    | ALLVTVS <b>L</b> LSVLLFAFNLLCDA  |    |
| OsSIP2;1 |    | ADAVKVAL <b>S</b> LVYMFFFAWLEGF  |    |
| ZmSIP1;1 |    | ALLVTT <b>S</b> LSVLLFTFDLLCGA   |    |
| ZmSIP1;2 |    | ALLVTVS <b>L</b> LSVLLFVFNILCDA  |    |
| ZmSIP2;1 |    | AEAVKV <b>S</b> LSVYMFLFAWLEAA   |    |
| AtSIP1;1 |    | PLVILT <b>S</b> LIFVYVSIFTVIF--  |    |
| AtSIP1;2 |    | PLVIST <b>L</b> VVFSISIFTVIGNV   |    |
| AtSIP2;1 |    | GEIVRY <b>L</b> FSIISMFI FAYLQQA |    |
