# Supplementary material for: Homology modeling of major intrinsic proteins in rice, maize and Arabidopsis: comparative analysis of transmembrane helix association and aromatic/arginine selectivity filters
Source: PubMed Central journal article supplement (PMC1866351; doi:10.1186/1472-6807-7-27), 2007-04-19
Supplement: 1472-6807-7-27-S3.pdf [file 1472-6807-7-27-S3.pdf]

## Structure-based sequence alignment of TM3

Helix 3 PIP

|          |     |                            |     |
|----------|-----|----------------------------|-----|
| 1J4N     | 92  | SVLRAIMYIIAQCVGAIIVATAILSG | 116 |
| 1FX8     | 82  | DKRKVIPFIVSQVAGAFCAAALVYG  | 106 |
| 1RC2     | 77  | PAKEVVGIVIAQVGGIVAAALLYL   | 101 |
| 1Z98     | 115 | SLLRALVYMIAQCLGAICGVGLVKA  | 139 |
| 2B6O     | 82  | SLLRAICYVVAQLLGAVAGAAVLYS  | 106 |
| 2F2B     | 96  | PGREVPYIIAQLLGAAFGSFIFLQ   | 120 |
| OsPIP1;1 |     | SLTRAIIFYIVMQCLGAICGAGVVKG |     |
| OsPIP1;2 |     | SLTRALFYMVMQCLGAICGAGVVKG  |     |
| OsPIP1;3 |     | SLTRAVFYMAMQCLGAICGAGVVKG  |     |
| OsPIP1;4 |     | SLSRAIFYILMQCLGAICRTGFVKG  |     |
| OsPIP1;5 |     | SLTRALFYMVMQCLGAICGAGVVKG  |     |
| OsPIP2;1 |     | SLVRAILYIVAQCLGAICGVGLVKA  |     |
| OsPIP2;2 |     | SLIRAVLYIIAQCLGAICGVGLVKG  |     |
| OsPIP2;3 |     | SLVRVLYIVAQSLGAICGVGLVKG   |     |
| OsPIP2;4 |     | SLVRALLYMAAQCLGAICGVALVKG  |     |
| OsPIP2;5 |     | SLVRAILYIVAQCLGAVCGVALVKG  |     |
| OsPIP2;6 |     | SVIRAVMYIVAQCLGGIVGVGIVKG  |     |
| OsPIP2;7 |     | SLVRTVLYVVAQCLGAIAGAGIVKG  |     |
| OsPIP2;8 |     | SLPRAALYTMAQCVGAVCGAGLARA  |     |
| ZmPIP1;1 |     | SLTRAVFYIIMQCLGAICGRGVVKG  |     |
| ZmPIP1;2 |     | SLTRALFYIIMQCLGAVCGAGVVKG  |     |
| ZmPIP1;3 |     | SLTRAIFYIIMQCLGAICGAGVVKG  |     |
| ZmPIP1;4 |     | SLTRAIFYIIMQCLGAICGAGVVKG  |     |
| ZmPIP1;5 |     | SLTRALFYMVMQCLGAICGAGVVKG  |     |
| ZmPIP1;6 |     | SLTRAVYYVVMQCLGAVCGAGVVKA  |     |
| ZmPIP2;1 |     | SLVRALLYIVAQCLGAICGVGLVKA  |     |
| ZmPIP2;2 |     | SLVRALLYMVAQCLGAVCGVGLVKA  |     |
| ZmPIP2;3 |     | SLVRALLYIIAQCLGAICGVGLVKG  |     |
| ZmPIP2;4 |     | SLVRALLYIIAQCLGAICGVGLVKG  |     |
| ZmPIP2;5 |     | SLVRALLYIVAQCLGAICGVGLVKG  |     |
| ZmPIP2;6 |     | SLVRALLYMAAQSLGAICGVALVKG  |     |
| ZmPIP2;7 |     | SLVRALLYMIAQCAGAIAGLAKG    |     |
| AtPIP1;1 |     | SLTRALYYIVMQCLGAICGAGVVKG  |     |
| AtPIP1;2 |     | SLTRAVYYIVMQCLGAICGAGVVKG  |     |
| AtPIP1;3 |     | SLTRAVFYIVMQCLGAICGAGVVKG  |     |
| AtPIP1;4 |     | SLTRAVFYMIMQCLGAICGAGVVKG  |     |
| AtPIP1;5 |     | SLTRALFYIVMQCLGAICGAGVVKG  |     |
| AtPIP2;1 |     | SLPRALLYIIAQCLGAICGVGFVKA  |     |
| AtPIP2;2 |     | SLIRAVLYMVAQCLGAICGVGFVKA  |     |
| AtPIP2;3 |     | SLIRAVLYMVAQCLGAICGVGFVKA  |     |
| AtPIP2;4 |     | SLVRTVLYIVAQCLGAICGCGFVKA  |     |
| AtPIP2;5 |     | TLVRAVMYMVAQCLGAICGVALVKA  |     |
| AtPIP2;6 |     | SLVRVSYMVAQCLGATCGVGLVKV   |     |
| AtPIP2;7 |     | SLVRALGYMIAQCLGAICGVGFVKA  |     |
| AtPIP2;8 |     | SLPRAVAYMVAQCLGAICGVGLVKA  |     |

Helix 3 TIP

|          |     |                           |     |
|----------|-----|---------------------------|-----|
| 1J4N     | 92  | SVLRAIMYIIAQCVGAIVATAILSG | 116 |
| 1FX8     | 82  | DKRKVIPFIVSQVAGAFCAAALVYG | 106 |
| 1RC2     | 77  | PAKEVVGIVIAQVVGIVAAALLYL  | 101 |
| 1Z98     | 115 | SLLRALVYMIAQCLGAICGVGLVKA | 139 |
| 2B60     | 82  | SLLRACYVVAQLLGAVAGAAVLYS  | 106 |
| 2F2B     | 96  | PGREVVPYIIAQLLGAAFGSFIFLQ | 120 |
| OsTIP1;1 |     | TLFRGLLYWIAQLLGSTVACFLLRF |     |
| OsTIP1;2 |     | SLVKAVVYWVAQLLGSVVAACLLKI |     |
| OsTIP2;1 |     | TILTGLFYWIAQLLGASIAACLLKF |     |
| OsTIP2;2 |     | TILTGVFYWIAQLLGAIVGAVLVQF |     |
| OsTIP2;3 |     | TILTGIFYWVAQLLGASVACLLCSS |     |
| OsTIP3;1 |     | SLIRALFYWLAQLLGAVVATLLLR  |     |
| OsTIP3;2 |     | SFARAALYWAAQLLGAVLAVLLLR  |     |
| OsTIP4;1 |     | TAFRSALYVAAQLLASSLACILLRY |     |
| OsTIP4;2 |     | TLFRSALYVAAQLAGSSLACLLLR  |     |
| OsTIP4;3 |     | TLFRSALYAAAQLLGSSLACLLLAA |     |
| OsTIP5;1 |     | TVPSAIFYWASQMLGSTFACLVLHY |     |
| ZmTIP1;1 |     | TLFRGLLYWVAQLLGSTVACFLLRF |     |
| ZmTIP1;2 |     | SLLKALVYWVAQLLGSVVAACLLKI |     |
| ZmTIP2;1 |     | TILTGVFYWVAQLLGATVACLLGF  |     |
| ZmTIP2;2 |     | TVLTGLFYWVAQLLGASVACLLRF  |     |
| ZmTIP2;3 |     | TILTGILYWVAQLLGASVACFLLOY |     |
| ZmTIP3;1 |     | SLVRAVLYWVAQLLGAVAATLLLR  |     |
| ZmTIP4;1 |     | TKLRVLYVAAQLLASSAACVLLRF  |     |
| ZmTIP4;2 |     | TKLRALLYVAAQLLASSLACILLRY |     |
| ZmTIP4;3 |     | TLFRSSLYIAAQMLASSAACFLLRW |     |
| ZmTIP4;4 |     | TLFRSALYVAAQLLGSTLACLLLAF |     |
| ZmTIP5;1 |     | GVPSAMFYWASQLLGATFACLNL   |     |
| AtTIP1;1 |     | TLRGILYWIAQLLGSVVAACILKF  |     |
| AtTIP1;2 |     | TLRGILYWIAQLLGSVAACFLLSF  |     |
| AtTIP1;3 |     | TLRAILYWIAQLLGAVVACLLKV   |     |
| AtTIP2;1 |     | TVITGVFYWIAQLLGSTAACFLLKY |     |
| AtTIP2;2 |     | TVITGFFYWIAQCLGSIVACLLLVF |     |
| AtTIP2;3 |     | TLITGFFYWIAQCLGSIVACLLLVF |     |
| AtTIP3;1 |     | TAIRAIYYWIAQLLGAILACLLLR  |     |
| AtTIP3;2 |     | SVIRAIYYWVAQLIGAILACLLLR  |     |
| AtTIP4;1 |     | SVFRAFLYWIDQLASSAACFLLSY  |     |
| AtTIP5;1 |     | SVPTAMFYWTSQMIASVMACLVLKV |     |

Helix 3 NIP

|          |     |                            |     |
|----------|-----|----------------------------|-----|
| 1J4N     | 92  | SVLRAIMYIIAQCVGAIVATAILSG  | 116 |
| 1FX8     | 82  | DKRKVIPFIVSQVAGAFCAAALVYG  | 106 |
| 1RC2     | 77  | PAKEVVGIVIAQVVGIVAAALLYL   | 101 |
| 1Z98     | 115 | SLLRALVYMIAQCLGAIKGVGLVKA  | 139 |
| 2B60     | 82  | SLLRAICYVVAQLLGAVAGAAVLYS  | 106 |
| 2F2B     | 96  | PGREVVPYIIAQLLGAAFGSFIFLQ  | 120 |
| OsNIP1;1 |     | PWRQVPAYAAAQMLGATLAAGTLRL  |     |
| OsNIP1;2 |     | RWKQVPSYVVAQVLGSTMASLTLRV  |     |
| OsNIP1;3 |     | PWRRVPAYAAAQVAGSAAASAALRA  |     |
| OsNIP1;4 |     | PWRRAPAYALAQTAAATAASVVLRL  |     |
| OsNIP1;5 |     | VVINVPYVVAQVLGSTMASLTLRV   |     |
| OsNIP2;1 |     | PWIQVPFYWAAQFTGAICASFVLKA  |     |
| OsNIP2;2 |     | PWIQVPFYWAAQFTGAMCAAFVLRA  |     |
| OsNIP3;1 |     | PWLQVPAYVAVQVLGSICAGFALKG  |     |
| OsNIP3;2 |     | PPAHLHPYIAAQILGSITASFVKG   |     |
| OsNIP3;3 |     | PSAHLHPYISSQILGAVAASFVKG   |     |
| OsNIP3;4 |     | QPAHLHPYAAAQVLGAVAAAAVDG   |     |
| OsNIP3;5 |     | PPAHLHPYAAVQTAASLAAAFALKG  |     |
| OsNIP4;1 |     | VWPKLPLYVAAQLAGSLLACL SVNA |     |
| ZmNIP1;1 |     | PWRQLPAYVLAQMLGATLASGTLRL  |     |
| ZmNIP2;1 |     | PWIQVPFYWAAQFTGSICASFVLKA  |     |
| ZmNIP2;2 |     | PWIQVPFYWAAQFTGAMCAAFVLKA  |     |
| ZmNIP3;1 |     | PWLQVPAYVAVQALASVCAAFALKG  |     |
| AtNIP1;1 |     | PLKQVPAYVISQVIGSTLAAATLRL  |     |
| AtNIP1;2 |     | PLKQVPAYVISQVIGSTLAAATLRL  |     |
| AtNIP2;1 |     | PLNQVPAYITVQVIGSTLASATLRL  |     |
| AtNIP3;1 |     | PFNQVPGYIAAQLLGSTLAAAVLRL  |     |
| AtNIP4;1 |     | PWHQVPLYIGAQFAGSLLASLTLRL  |     |
| AtNIP4;2 |     | PWYQVPLYIGAQLTGSLLASLTLRL  |     |
| AtNIP5;1 |     | PWAHVPAVIAAQVSASICASFALKG  |     |
| AtNIP6;1 |     | PWKHVPVYIGAQVMASVSAAFALKA  |     |
| AtNIP7;1 |     | PWSQVPLYITAQTLGATAATLVGVS  |     |

Helix 3 SIP

|          |     |                           |     |
|----------|-----|---------------------------|-----|
| 1J4N     | 92  | SVLRAIMYIIAQCVGAIVATAILSG | 116 |
| 1FX8     | 82  | DKRKVIPFIVSQVAGAFCAAALVYG | 106 |
| 1RC2     | 77  | PAKEVVGIVIAQVVGIVAAALLYL  | 101 |
| 1Z98     | 115 | SLLRALVYMIAQCLGAIKGVGLVKA | 139 |
| 2B60     | 82  | SLLRAICYVVAQLLGAVAGAAVLYS | 106 |
| 2F2B     | 96  | PGREVVPYIIAQLLGAAFGSFIFLQ | 120 |
| OsSIP1;1 |     | SLFPLALRFPAQAAGAVGGAMAISE |     |
| OsSIP2;1 |     | YLFAAFVRMPAQVFGSILGVKLIRA |     |
| ZmSIP1;1 |     | SLFSVALRFPAQAAGAVGGALAISE |     |
| ZmSIP1;2 |     | SLFSIALRLPAQAAGAVGGALAISE |     |
| ZmSIP2;1 |     | YLFTAFARIPAQVIGAVLGVKLIQV |     |
| AtSIP1;1 |     | TLFSLAIRLPAQAIGAAGGALAIME |     |
| AtSIP1;2 |     | SLFSLAIRSPAQAIGAAGGAITIME |     |
| AtSIP2;1 |     | FIFSVFVRIPVEVIGSILAVKHIIH |     |
