# Supplementary material for: Homology modeling of major intrinsic proteins in rice, maize and Arabidopsis: comparative analysis of transmembrane helix association and aromatic/arginine selectivity filters
Source: PubMed Central journal article supplement (PMC1866351; doi:10.1186/1472-6807-7-27), 2007-04-19
Supplement: 1472-6807-7-27-S4.pdf [file 1472-6807-7-27-S4.pdf]

## Structure-based sequence alignment of TM4

Helix 4 PIP

|          |     |                          |     |
|----------|-----|--------------------------|-----|
| 1J4N     | 137 | SGQGLGIEIIGTLQLVLCVLATT  | 159 |
| 1FX8     | 145 | FVQAFVAVEMVITAILMGLILALT | 167 |
| 1RC2     | 131 | MLSALVVELVLSAGFLLVIHGAT  | 153 |
| 1Z98     | 161 | KGTALGAEIIGTFVLVYTVFSAT  | 183 |
| 2B6O     | 127 | VGQATIVEIFLTLQFVLCIFATY  | 149 |
| 2F2B     | 143 | YWQAMLAEVVGTFLLMITIMGIA  | 165 |
| OsPIP1;1 |     | KGDGLGAEIVGTFILVYTVFSAT  |     |
| OsPIP1;2 |     | KGDGLGAEIVGTFILVYTVFSAT  |     |
| OsPIP1;3 |     | KGDGLGAEIVGTFVLVYTVFSAT  |     |
| OsPIP1;4 |     | KGDGLGAEIVGTFILVYTVFSAT  |     |
| OsPIP1;5 |     | KGDRLGAEIVGTFILVYTVFSAT  |     |
| OsPIP2;1 |     | KGTGLAAEIIIGTFVLVYTVFSAT |     |
| OsPIP2;2 |     | KGTGLGAEIIGTFVLVYTVFSAT  |     |
| OsPIP2;3 |     | KGTGLAAEIIIGTFVLVYTVFSAT |     |
| OsPIP2;4 |     | TGTGLAAEIIIGTFVLVYTVFSAT |     |
| OsPIP2;5 |     | KGTGLAAEIIIGTFVLVYTVFSAT |     |
| OsPIP2;6 |     | TGTALGAEIIGTFVLVYTVFSAT  |     |
| OsPIP2;7 |     | AAGALGAEIVGTFILVYTVFSAT  |     |
| OsPIP2;8 |     | AGAGVVAEMVGTFFVLVYTVFSAT |     |
| ZmPIP1;1 |     | KGDGLGAEIVGTFILVYTVFSAT  |     |
| ZmPIP1;2 |     | KGDGLGAEIVGTFILVYTVFSAT  |     |
| ZmPIP1;3 |     | KGDGLGAEIVGTFILVYTVFSAT  |     |
| ZmPIP1;4 |     | KGDGLGAEIVGTFILVYTVFSAT  |     |
| ZmPIP1;5 |     | KGDGLGAEIVGTFVLVYTVFSAT  |     |
| ZmPIP1;6 |     | KGDGLGAEVVGTFFVLVYTVFSAT |     |
| ZmPIP2;1 |     | RGTGLGAEIIGTFVLVYTVFSAT  |     |
| ZmPIP2;2 |     | RGAGLGAEIVGTFVLVYTVFSAT  |     |
| ZmPIP2;3 |     | KGTGLAAEIIIGTFVLVYTVFSAT |     |
| ZmPIP2;4 |     | KGTGLAAEIIIGTFVLVYTVFSAT |     |
| ZmPIP2;5 |     | KGTGLAAEIIIGTFVLVYTVFSAT |     |
| ZmPIP2;6 |     | TGTGLAAEIIIGTFVLVYTVFSAT |     |
| ZmPIP2;7 |     | KGTALGAEIIGTFVLVYTVFSAT  |     |
| AtPIP1;1 |     | KGSGLGAEIIGTFVLVYTVFSAT  |     |
| AtPIP1;2 |     | KGSGLGAEIIGTFVLVYTVFSAT  |     |
| AtPIP1;3 |     | KGSGLGAEIIGTFVLVYTVFSAT  |     |
| AtPIP1;4 |     | KGSGLGAEIIGTFVLVYTVFSAT  |     |
| AtPIP1;5 |     | KGSGLGAEIVGTFVLVYTVFSAT  |     |
| AtPIP2;1 |     | TGTGLAAEIIIGTFVLVYTVFSAT |     |
| AtPIP2;2 |     | TGTGLAAEIIIGTFVLVYTVFSAT |     |
| AtPIP2;3 |     | TGTGLAAEIIIGTFVLVYTVFSAT |     |
| AtPIP2;4 |     | KGTGLGAEIIGTFVLVYTVFSAT  |     |
| AtPIP2;5 |     | IGTGVAEIIIGTFVLVYTVFSAT  |     |
| AtPIP2;6 |     | VGVGVGAEIIGTFVLVYTVFSAT  |     |
| AtPIP2;7 |     | KGTALGAEIIGTFVLVYTVFSAT  |     |
| AtPIP2;8 |     | TGTALGAEIIGTFVLVYTVFSAT  |     |

Helix4 TIP

|          |     |                          |     |
|----------|-----|--------------------------|-----|
| 1J4N     | 137 | SGQGLGIEIIGTLQLVLCVLATT  | 159 |
| 1FX8     | 145 | FVQAFVEMVITAILMGLILALT   | 167 |
| 1RC2     | 131 | MLSALVVELVLSAGFLLVIHGAT  | 153 |
| 1Z98     | 161 | KGTALGAEIIGTFVLVYTVFSAT  | 183 |
| 2B6O     | 127 | VGQATIVEIFLTLQFVLCIFATY  | 149 |
| 2F2B     | 143 | YWQAMLAEVVGTFLLMITIMGIA  | 165 |
| OsTIP1;1 |     | VWEALVLEIVMTFGLVYTVYATA  |     |
| OsTIP1;2 |     | AWNAVVFIEIVMTFGLVYTVYATA |     |
| OsTIP2;1 |     | ELEGVVMEIVITFALVYTVYATA  |     |
| OsTIP2;2 |     | AFEGVVMEIIVTFGLVYTVYATA  |     |
| OsTIP2;3 |     | EIEGMVMEIVITFALVYTVYATA  |     |
| OsTIP3;1 |     | DWHAVLLEATMTFGLMYAYYATV  |     |
| OsTIP3;2 |     | ERHALLLEVVMTFGLVYTVYATA  |     |
| OsTIP4;1 |     | PMQGLVMEIILTFSLLFVYATI   |     |
| OsTIP4;2 |     | PVQGVAAEAVFTFTLLLVICATI  |     |
| OsTIP4;3 |     | AARAVAMEAVLTFSLLFVYATV   |     |
| OsTIP5;1 |     | GFGAGILEGVLTFMVVYTVHVAG  |     |
| ZmTIP1;1 |     | VWEALVLEIVMTFGLVYTVYATA  |     |
| ZmTIP1;2 |     | AMNAVVLEMVMTFGLVYTVYATA  |     |
| ZmTIP2;1 |     | ELEGVVFEVVITFALVYTVYATA  |     |
| ZmTIP2;2 |     | ELEGVVFEIVITFALVYTVYATA  |     |
| ZmTIP2;3 |     | EIEGVVMEIVITFALVYTVYATA  |     |
| ZmTIP3;1 |     | DWHAVLLEAVMTFGLMYAYYATV  |     |
| ZmTIP4;1 |     | PMQGLVMEVILTFSLLFVYAMI   |     |
| ZmTIP4;2 |     | PMQGLVMEVILTFSLLFVYAMI   |     |
| ZmTIP4;3 |     | PLQGVVAEAVFTFSLLFVIYATI  |     |
| ZmTIP4;4 |     | ALRGVLMEAVLTFSLLFVYATV   |     |
| ZmTIP5;1 |     | GFGGAVLEGVLTFLLVYTVHVVG  |     |
| AtTIP1;1 |     | VLNAFVFEIVMTFGLVYTVYATA  |     |
| AtTIP1;2 |     | SLNALVFEIVMTFGLVYTVYATA  |     |
| AtTIP1;3 |     | PWNAVVFIEIVMTFGLVYTVYATA |     |
| AtTIP2;1 |     | SIEGVVMEIITFALVYTVYATA   |     |
| AtTIP2;2 |     | AIEGVVMEIVVTFALVYTVYATA  |     |
| AtTIP2;3 |     | AVEGVVMEIVVTFALVYTVYATA  |     |
| AtTIP3;1 |     | AVNGLVLEIILTFGLVYVYVSTL  |     |
| AtTIP3;2 |     | ELHGLLMEIILTFALVYVYVSTA  |     |
| AtTIP4;1 |     | YTQGIWEIILTFSLLFVYATI    |     |
| AtTIP5;1 |     | GFGASVLEGVLAFLVYTVFTAS   |     |

Helix 4 NIP

|          |     |                          |     |
|----------|-----|--------------------------|-----|
| 1J4N     | 137 | SGQGLGIEIIGTLQLVLCVLATT  | 159 |
| 1FX8     | 145 | FVQAFVAVEMVITAILMGLILALT | 167 |
| 1RC2     | 131 | MLSALVVELVLSAGFLLVIHGAT  | 153 |
| 1Z98     | 161 | KGTALGAEIIGTFVLVYTVFSAT  | 183 |
| 2B6O     | 127 | VGQATIVEIFLTLQFVLCIFATY  | 149 |
| 2F2B     | 143 | YWQAMLAEVVGTFLLMITIMGIA  | 165 |
| OsNIP1;1 |     | DVQSLVLEFIIITFYLMFVISGVA |     |
| OsNIP1;2 |     | MAQAAALEFVISFFLMFVVSVA   |     |
| OsNIP1;3 |     | DVQSLAMEFIIITFYLMFVVSVA  |     |
| OsNIP1;4 |     | HAQSLVIEFVITFYLMFVIMAVA  |     |
| OsNIP1;5 |     | MAQAAALEFVISFFLMFVVSVA   |     |
| OsNIP2;1 |     | HWHSLVVEVIVTFNMMFVTLAVA  |     |
| OsNIP2;2 |     | HWHALVIEIVVTFNMMFVTCAVA  |     |
| OsNIP3;1 |     | TAQAFFTEFIIITFNLLFVVTAVA |     |
| OsNIP3;2 |     | TVEAFFLEFVTTFVLLFIITALA  |     |
| OsNIP3;3 |     | TVEAFFVEFIIITFLLFIITALA  |     |
| OsNIP3;4 |     | VKELIAVAVGGTAMMNVLVAG--  |     |
| OsNIP3;5 |     | AGEAFVVEVALTFVLSKELVAI-  |     |
| OsNIP4;1 |     | TRLPFLMEFLASAVLMIVIATVA  |     |
| ZmNIP1;1 |     | EVQSLVIEIITTFYLMFVISGVA  |     |
| ZmNIP2;1 |     | HWHSLVIEIIVTFNMMFVTLAVA  |     |
| ZmNIP2;2 |     | HWHALLIEIVVTFNMMFVTCAVA  |     |
| ZmNIP3;1 |     | TAQAFFTEFIIISFNLLFVVTAVA |     |
| AtNIP1;1 |     | DLQAFVMEFIVTFYLMFVISGVA  |     |
| AtNIP1;2 |     | NLQSFVIEFIIITFYLMFVISGVA |     |
| AtNIP2;1 |     | DLQAFVMEFIIITGFLMLVCAVT  |     |
| AtNIP3;1 |     | NTTSFVMEFIATFNLMFVISAVA  |     |
| AtNIP4;1 |     | PARALVAEIIISFLLMFVISGVA  |     |
| AtNIP4;2 |     | SGQALVAEIIISFLLMFVISGVA  |     |
| AtNIP5;1 |     | LGQAFALEFIIITFILLFVVTAVA |     |
| AtNIP6;1 |     | LSQAFALEFIIISFNLMFVVTAVA |     |
| AtNIP7;1 |     | CVSAFFVELIATSIVVFLASALH  |     |

Helix 4 SIP

|          |     |                          |     |
|----------|-----|--------------------------|-----|
| 1J4N     | 137 | SGQGLGIEIIGTLQLVLCVLATT  | 159 |
| 1FX8     | 145 | FVQAFVAVEMVITAILMGLILALT | 167 |
| 1RC2     | 131 | MLSALVVELVLSAGFLLVIHGAT  | 153 |
| 1Z98     | 161 | KGTALGAEIIGTFVLVYTVFSAT  | 183 |
| 2B6O     | 127 | VGQATIVEIFLTLQFVLCIFATY  | 149 |
| 2F2B     | 143 | YWQAMLAEVVGTFLLMITIMGIA  | 165 |
| OsSIP1;1 |     | LHTGAAAELVLTfVITLAVLWII  |     |
| OsSIP2;1 |     | VHHGALAEGLATFMVVIVSVTLK  |     |
| ZmSIP1;1 |     | PHTGALAEGVLTfVITLTVLWVI  |     |
| ZmSIP1;2 |     | PHTGAGAELVLTfVITLAVLLII  |     |
| ZmSIP2;1 |     | AHHGALAEGLATFMVVMVSVTLK  |     |
| AtSIP1;1 |     | VHTGAIAETILSFGITFAVLLII  |     |
| AtSIP1;2 |     | AHNGAISEVVLsFSVTFVLVLLII |     |
| AtSIP2;1 |     | IHHGALTEGILTFFIVLLSMGLT  |     |
