# Supplementary material for: Homology modeling of major intrinsic proteins in rice, maize and Arabidopsis: comparative analysis of transmembrane helix association and aromatic/arginine selectivity filters
Source: PubMed Central journal article supplement (PMC1866351; doi:10.1186/1472-6807-7-27), 2007-04-19
Supplement: 1472-6807-7-27-S5.pdf [file 1472-6807-7-27-S5.pdf]

## Structure-based sequence alignment of TM5

Helix 5 PIP

|          |     |                      |     |
|----------|-----|----------------------|-----|
| 1J4N     | 169 | SGPLAIGFSVALGHLLAID  | 187 |
| 1FX8     | 178 | LAPLLIGLLIAVIGASMG   | 196 |
| 1RC2     | 161 | FAPIAIGLALTLIHLISIP  | 179 |
| 1Z98     | 197 | LAPLPIGFVAVFMVHLATIP | 215 |
| 2B6O     | 159 | SVALAVGFSLTLGHFLFGMY | 177 |
| 2F2B     | 174 | FAGIIIGLTVAGIITTLGN  | 192 |
| OsPIP1;1 |     | LAPLPIGFVAVFLVHLATIP |     |
| OsPIP1;2 |     | LAPLPIGFVAVFLVHLATIP |     |
| OsPIP1;3 |     | LAPLPIGFVAVFLVHLATIP |     |
| OsPIP1;4 |     | LAPLPIGFVAVFLVHLATIP |     |
| OsPIP1;5 |     | LAPLPIGFVAVFLVHLATIP |     |
| OsPIP2;1 |     | LAPLPIGFVAVFMVHLATIP |     |
| OsPIP2;2 |     | LAPLPIGFVAVFMVHLATIP |     |
| OsPIP2;3 |     | LAPLPIGFVAVFMVHLATIP |     |
| OsPIP2;4 |     | LAPLPIGFVAVFMVHLATIP |     |
| OsPIP2;5 |     | LAPLPIGFVAVFMVHLATIP |     |
| OsPIP2;6 |     | LAPLPIGFVAVFMVHLATIP |     |
| OsPIP2;7 |     | LVPLPIGFVAVFVHLATIP  |     |
| OsPIP2;8 |     | LAPLPIGLAVLVVHLATIP  |     |
| ZmPIP1;1 |     | LAPLPIGFVAVFLVHLATMG |     |
| ZmPIP1;2 |     | LAPLPIGFVAVFLVHLATIP |     |
| ZmPIP1;3 |     | LAPLPIGFVAVFLVHLATIP |     |
| ZmPIP1;4 |     | LAPLPIGFVAVFLVHLATIP |     |
| ZmPIP1;5 |     | LAPLPIGFVAVFLVHLATIP |     |
| ZmPIP1;6 |     | LAPLPIGFVAVFLVHLATIP |     |
| ZmPIP2;1 |     | LAPLPIGFVAVFMVHLATIP |     |
| ZmPIP2;2 |     | LAPLPIGFVAVFMVHLATIP |     |
| ZmPIP2;3 |     | LAPLPIGFVAVFMVHLATIP |     |
| ZmPIP2;4 |     | LAPLPIGFVAVFMVHLATIP |     |
| ZmPIP2;5 |     | LAPLPIGFVAVFMVHLATIP |     |
| ZmPIP2;6 |     | LAPLPIGFVAVFMVHLATIP |     |
| ZmPIP2;7 |     | LAPLPIGFVAVFMVHLATIP |     |
| AtPIP1;1 |     | LAPLPIGFVAVFLVHLATIP |     |
| AtPIP1;2 |     | LAPLPIGFVAVFLVHLATIP |     |
| AtPIP1;3 |     | LAPLPIGFVAVFLVHLATIP |     |
| AtPIP1;4 |     | LAPLPIGFVAVFLVHLATIP |     |
| AtPIP1;5 |     | LAPLPIGFVAVFLVHLATIP |     |
| AtPIP2;1 |     | LAPLPIGFVAVFMVHLATIP |     |
| AtPIP2;2 |     | LAPLPIGFVAVFMVHLATIP |     |
| AtPIP2;3 |     | LAPLPIGFVAVFMVHLATIP |     |
| AtPIP2;4 |     | LAPLPIGFVAVFMVHLATIP |     |
| AtPIP2;5 |     | LAPLPIGFVAVFIVHLATIP |     |
| AtPIP2;6 |     | LAPLPIGFVAVFMVHLATIP |     |
| AtPIP2;7 |     | LAPLPIGFVAVFMVHLATIP |     |
| AtPIP2;8 |     | LAPLPIGFVAVFMVHLATIP |     |

Helix 5 TIP

|          |     |                               |     |
|----------|-----|-------------------------------|-----|
| 1J4N     | 169 | SGPLAIGFSVALG <b>H</b> LLAID  | 187 |
| 1FX8     | 178 | LAPLLIGLLIAVIG <b>G</b> ASMGP | 196 |
| 1RC2     | 161 | FAPIAIGLALTLI <b>H</b> LISIP  | 179 |
| 1Z98     | 197 | LAPLPIGFAVFMV <b>H</b> LATIP  | 215 |
| 2B6O     | 159 | SVALAVGFSLTLG <b>H</b> LFGMY  | 177 |
| 2F2B     | 174 | FAGIIIGLTVAGI <b>I</b> TTLGN  | 192 |
| OsTIP1;1 |     | IAPIAIGFIVGANILV <b>G</b> GA  |     |
| OsTIP1;2 |     | IAPIAIGFIVGANIL <b>A</b> GGGA |     |
| OsTIP2;1 |     | IAPIAIGFIVGANIL <b>A</b> AGP  |     |
| OsTIP2;2 |     | IAPIAIGFIVGANILV <b>A</b> GP  |     |
| OsTIP2;3 |     | VAPMAIGFIVGANIL <b>A</b> AGP  |     |
| OsTIP3;1 |     | IAPLAVGFLLGAN <b>M</b> LAGGP  |     |
| OsTIP3;2 |     | IAPLAIGLVAGANIL <b>A</b> GGP  |     |
| OsTIP4;1 |     | FGPLLTGLIVGAN <b>T</b> IAGGN  |     |
| OsTIP4;2 |     | TGPLLTGLLVGAN <b>T</b> VAGGA  |     |
| OsTIP4;3 |     | LGPLLVGLVVGANIL <b>A</b> GGP  |     |
| OsTIP5;1 |     | LGALVVGAVTGAC <b>V</b> LAAGS  |     |
| ZmTIP1;1 |     | IAPIAIGFIVGANILV <b>G</b> GA  |     |
| ZmTIP1;2 |     | IAPIAIGFIVGANIL <b>A</b> GGGA |     |
| ZmTIP2;1 |     | IAPIAIGFIVGANIL <b>A</b> AGP  |     |
| ZmTIP2;2 |     | IAPIAIGFIVGANIL <b>A</b> AGP  |     |
| ZmTIP2;3 |     | IAPMAIGFIVGANIL <b>A</b> AGP  |     |
| ZmTIP3;1 |     | IAPLAVGFLLGAN <b>V</b> LAGGP  |     |
| ZmTIP4;1 |     | IGPLLTGLIVGAN <b>S</b> LAGGN  |     |
| ZmTIP4;2 |     | IGPLLTGLIVGAN <b>S</b> LAGGN  |     |
| ZmTIP4;3 |     | AGPLLTGLLVGAN <b>S</b> VAGAA  |     |
| ZmTIP4;4 |     | MGPLLVGLVVGAN <b>V</b> LAGGP  |     |
| ZmTIP5;1 |     | LGALAVGLTQGA <b>F</b> VLAAGA  |     |
| AtTIP1;1 |     | IAPIAIGFIVGANIL <b>A</b> GGGA |     |
| AtTIP1;2 |     | IAPIAIGFIVGANIL <b>A</b> GGGA |     |
| AtTIP1;3 |     | IAPLAIGLIVGANILV <b>G</b> GA  |     |
| AtTIP2;1 |     | IAPLAIGLIVGANIL <b>A</b> AGP  |     |
| AtTIP2;2 |     | IAPIAIGFIVGANIL <b>A</b> AGP  |     |
| AtTIP2;3 |     | IAPIAIGFIVGANIL <b>A</b> AGP  |     |
| AtTIP3;1 |     | IAPLAIGLIVGANILV <b>G</b> GP  |     |
| AtTIP3;2 |     | IAPLAIGLIVGANILV <b>G</b> GP  |     |
| AtTIP4;1 |     | FGPLLTGFVVGANIL <b>A</b> GGGA |     |
| AtTIP5;1 |     | VGPIFIGFVAGAN <b>V</b> LAAGP  |     |

Helix 5 NIP

|          |     |                               |     |
|----------|-----|-------------------------------|-----|
| 1J4N     | 169 | SGPLAIGFSVALG <b>H</b> LLAID  | 187 |
| 1FX8     | 178 | LAPLLIGLLIAVIG <b>G</b> ASMGP | 196 |
| 1RC2     | 161 | FAPIAIGLALTLI <b>H</b> LISIP  | 179 |
| 1Z98     | 197 | LAPLPIGFAVFMV <b>H</b> LATIP  | 215 |
| 2B6O     | 159 | SVALAVGFSLTLG <b>H</b> LFGMY  | 177 |
| 2F2B     | 174 | FAGIIIGLTVAGI <b>I</b> TTLGN  | 192 |
| OsNIP1;1 |     | LAGLAVGATILLNVLIAGP           |     |
| OsNIP1;2 |     | LAGLAVGATVAVNVLFAGP           |     |
| OsNIP1;3 |     | LAGLAVGATVLVNVLFAGP           |     |
| OsNIP1;4 |     | MAGVAVGGTIMLN <b>V</b> LFAGP  |     |
| OsNIP1;5 |     | LAGLAVGATVAVNVLFAGP           |     |
| OsNIP2;1 |     | LAGLAVGSAVCIT <b>S</b> IFAGA  |     |
| OsNIP2;2 |     | LAGLAVGSAVCIT <b>S</b> IFAGP  |     |
| OsNIP3;1 |     | LAGIAVGAAVTLN <b>I</b> LIAGP  |     |
| OsNIP3;2 |     | LIAVAVGATIMM <b>N</b> ALVAGP  |     |
| OsNIP3;3 |     | LIAVAVGATVMM <b>N</b> ILVAGP  |     |
| OsNIP3;4 |     | --YACEILLCIY <b>N</b> VLVAGP  |     |
| OsNIP3;5 |     | ----AIAAAIMM <b>N</b> ALVGGP  |     |
| OsNIP4;1 |     | VGGIAIGAAVGG <b>L</b> GLVIGP  |     |
| ZmNIP1;1 |     | LAGLAVGATILLNVLIAGP           |     |
| ZmNIP2;1 |     | LAGLAVGSAVCIT <b>S</b> IFAGA  |     |
| ZmNIP2;2 |     | LAGLAVGSAVCIT <b>S</b> IFAGP  |     |
| ZmNIP3;1 |     | LAGIAVGAAVTLN <b>I</b> LVAGP  |     |
| AtNIP1;1 |     | LAGLAIGSTVLLNV <b>L</b> IAAP  |     |
| AtNIP1;2 |     | LAGLAVGSTVLLNV <b>I</b> IAGP  |     |
| AtNIP2;1 |     | LEGLIIGATVTLNV <b>I</b> FAGE  |     |
| AtNIP3;1 |     | FAGIAIGATIVLD <b>I</b> LFSGP  |     |
| AtNIP4;1 |     | LAGIAVGMTIMVN <b>V</b> FVAGP  |     |
| AtNIP4;2 |     | LAGIAVGMTI <b>I</b> ILNVFVAGP |     |
| AtNIP5;1 |     | LAGIAVGATVMLN <b>I</b> LVAGP  |     |
| AtNIP6;1 |     | LAGIAVGATVMLN <b>I</b> LIAGP  |     |
| AtNIP7;1 |     | LTGFVIGTVISL <b>G</b> VLITGP  |     |

Helix 5 SIP

|          |     |                               |     |
|----------|-----|-------------------------------|-----|
| 1J4N     | 169 | SGPLAIGFSVALG <b>H</b> LLAID  | 187 |
| 1FX8     | 178 | LAPLLIGLLIAVIG <b>G</b> ASMGP | 196 |
| 1RC2     | 161 | FAPIAIGLALTLI <b>H</b> LISIP  | 179 |
| 1Z98     | 197 | LAPLPIGFAVFMV <b>H</b> LATIP  | 215 |
| 2B6O     | 159 | SVALAVGFSLTLG <b>H</b> LFGMY  | 177 |
| 2F2B     | 174 | FAGIIIGLTVAGI <b>I</b> TTLGN  | 192 |
| OsSIP1;1 |     | VKTWMLSISTVCLVLTGAA           |     |
| OsSIP2;1 |     | MKTWISSIWKM <b>T</b> FHLLSSD  |     |
| ZmSIP1;1 |     | LKTLLLS <b>T</b> SIVSVILAGAE  |     |
| ZmSIP1;2 |     | IKTWMISICTLCLV <b>L</b> SGAA  |     |
| ZmSIP2;1 |     | MKTWITSIWKN <b>T</b> IHLLSSD  |     |
| AtSIP1;1 |     | AKTFLLALATIS <b>F</b> VVAGSK  |     |
| AtSIP1;2 |     | AKTFLLALATVSV <b>F</b> VVAGSK |     |
| AtSIP2;1 |     | MKTWIGSLAKLTL <b>H</b> ILGSD  |     |
