# Supplementary material for: Homology modeling of major intrinsic proteins in rice, maize and Arabidopsis: comparative analysis of transmembrane helix association and aromatic/arginine selectivity filters
Source: PubMed Central journal article supplement (PMC1866351; doi:10.1186/1472-6807-7-27), 2007-04-19
Supplement: 1472-6807-7-27-S6.pdf [file 1472-6807-7-27-S6.pdf]

## Structure-based sequence alignment of TM6

Helix 6 PIP

|          |     |                       |     |
|----------|-----|-----------------------|-----|
| 1J4N     | 212 | WIFWVGPFVGAALAVLIYDFI | 232 |
| 1FX8     | 234 | LVPLFGPIVGAIVGAFAYRKL | 254 |
| 1RC2     | 206 | WFFWVPIVGGIIGGLIYRTL  | 226 |
| 1Z98     | 243 | WIFWVGPFVGAALAAAYHQYV | 263 |
| 2B6O     | 202 | WVYWVGPVIGAGLGSLLYDFL | 222 |
| 2F2B     | 223 | SIYVIGPIVGAVLAALTYQYL | 243 |
| OsPIP1;1 |     | WIFWVGPFVGAALAAIYHQVI |     |
| OsPIP1;2 |     | WIFWVGPFVGAALAAIYHQVV |     |
| OsPIP1;3 |     | WIFWVGPFVGAALAAIYHVVV |     |
| OsPIP1;4 |     | WIFWVGPFVGAALAAIYHQVI |     |
| OsPIP1;5 |     | WIFWVGPLMGGALVAIYHQGV |     |
| OsPIP2;1 |     | WIFWVGPFVGAALAAIYHQYI |     |
| OsPIP2;2 |     | WIFWVGPLIGAAIAAAYHQYV |     |
| OsPIP2;3 |     | WIFWVGPLIGAAIAAAYHQYV |     |
| OsPIP2;4 |     | WIFWVGPFVGAALAAIYHQVI |     |
| OsPIP2;5 |     | WIFWVGPFVGAALAAIYHQIV |     |
| OsPIP2;6 |     | WIFWAGPFVGAALAAAYHQYI |     |
| OsPIP2;7 |     | WIFWVGPFVGAALAAAYHKLK |     |
| OsPIP2;8 |     | WIFWVGPFVGAALAAIYHYYI |     |
| ZmPIP1;1 |     | WIFWVGPFVGAALAAIYHQVI |     |
| ZmPIP1;2 |     | WIFWVGPFVGAALAAIYHQVI |     |
| ZmPIP1;3 |     | WIFWVGPFVGAALAAIYHQVI |     |
| ZmPIP1;4 |     | WIFWVGPFVGAALAAIYHQVI |     |
| ZmPIP1;5 |     | WIFWVGPFVGAALAAIYHVVI |     |
| ZmPIP1;6 |     | WIFWVGPFVGAALAAVYHQVV |     |
| ZmPIP2;1 |     | WIFWVGPLVGAALAAIYHQYI |     |
| ZmPIP2;2 |     | WIFWVGPLVGAALAAIYHQYI |     |
| ZmPIP2;3 |     | WIFWVGPLVGAALAAIYHQYV |     |
| ZmPIP2;4 |     | WIFWVGPLVGAALAAIYHQYV |     |
| ZmPIP2;5 |     | WIFWVGPFVGAALAAIYHQYV |     |
| ZmPIP2;6 |     | WIFWVGPFVGAALAAIYHQIV |     |
| ZmPIP2;7 |     | WIFWVGPFVGAALAAIYHQYI |     |
| AtPIP1;1 |     | WIFWVGPFVGAALAAIYHVVV |     |
| AtPIP1;2 |     | WIFWVGPFVGAALAAIYHVIV |     |
| AtPIP1;3 |     | WIFWVGPFVGAALAAIYHQLV |     |
| AtPIP1;4 |     | WIFWVGPFVGAALAAIYHQIV |     |
| AtPIP1;5 |     | WIFWVGPFVGAALAAIYHQIV |     |
| AtPIP2;1 |     | WIFWVGPFVGAALAAIYHQFV |     |
| AtPIP2;2 |     | WIFWVGPFVGAALAAIYHQFV |     |
| AtPIP2;3 |     | WIFWVGPFVGAALAAIYHQFV |     |
| AtPIP2;4 |     | WIFWVGPMVGAALAAIYHQFI |     |
| AtPIP2;5 |     | WIFWVGPFVGAALAAIYHQFV |     |
| AtPIP2;6 |     | WIFWVGPFVGAALAAIYHQFV |     |
| AtPIP2;7 |     | WIFWVGPFVGAALAAIYHQYI |     |
| AtPIP2;8 |     | WIFWVGPFVGAALAAIYHQYI |     |

Helix 6 TIP

|          |     |                        |     |
|----------|-----|------------------------|-----|
| 1J4N     | 212 | WIFWVGPFIGAALAVLIYDFI  | 232 |
| 1FX8     | 234 | LVPLFGPIVGAIVGAFAYRKL  | 254 |
| 1RC2     | 206 | WFFWVPIVGGIIGGLIYRTL   | 226 |
| 1Z98     | 243 | WIFWVGPFIGA AVAAAYHQYV | 263 |
| 2B6O     | 202 | WVYWVGPIVAGLGSLLYDFL   | 222 |
| 2F2B     | 223 | SIYVIGPIVAVLAALTYQYL   | 243 |
| OsTIP1;1 |     | WVYWVGPLIGGGLAGVIYEV   |     |
| OsTIP1;2 |     | WVYWLGPVFGAAIAALIYDII  |     |
| OsTIP2;1 |     | WVYWVGPLIGGGLAGLVYGDV  |     |
| OsTIP2;2 |     | WIYWVGPLVGGGLAGLVYRYV  |     |
| OsTIP2;3 |     | WVYWVGPLIGGGLAGLVYDDV  |     |
| OsTIP3;1 |     | WVYWLGPVFGAGLAGLLEYEYL |     |
| OsTIP3;2 |     | WVYWLGPLIGAGMAGALYEFV  |     |
| OsTIP4;1 |     | WIYWLGPLIGGPLAGLVYESL  |     |
| OsTIP4;2 |     | WVYWVGPLAGGPLAVVAYELL  |     |
| OsTIP4;3 |     | WIYWVGPLIGGPLAGLVYEGL  |     |
| OsTIP5;1 |     | AVYWAGPMVGA AVAALVHQAL |     |
| ZmTIP1;1 |     | WVYWVGPLIGGGLAGVIYELL  |     |
| ZmTIP1;2 |     | WVYWVGPLAGAAIAALVYDII  |     |
| ZmTIP2;1 |     | WVYWVGPLVGGGLAGLVYGDV  |     |
| ZmTIP2;2 |     | WVYWVGPLIGGGLAGLVYGDV  |     |
| ZmTIP2;3 |     | WVYWVGPLVGGGLAGLVYGDV  |     |
| ZmTIP3;1 |     | WVYWLGPFLGAGLAGLVYEYL  |     |
| ZmTIP4;1 |     | WVYWIGPLLGGPLAGFVYESL  |     |
| ZmTIP4;2 |     | WVYWIGPLLGGSLAGFVYESL  |     |
| ZmTIP4;3 |     | WVYWVGPLAGGPLAVLVYECC  |     |
| ZmTIP4;4 |     | WVYWVGPLIGGPLAGLVYDGL  |     |
| ZmTIP5;1 |     | AVYWAGPMVGA AVAALVYQIM |     |
| AtTIP1;1 |     | WVYWAGPLVGGGIAGLIYEVF  |     |
| AtTIP1;2 |     | WVYWAGPLIGGGLAGIIYDFV  |     |
| AtTIP1;3 |     | WVYWVGPFIGA AIAAIVYDTI |     |
| AtTIP2;1 |     | WVYWVGPLIGGGLAGLIYGNV  |     |
| AtTIP2;2 |     | WIYWVGPLVGGALAGLIYGDV  |     |
| AtTIP2;3 |     | WIYWVGPLVGGALAGLIYGDV  |     |
| AtTIP3;1 |     | WIYWVGPFIGSALAALIYEYM  |     |
| AtTIP3;2 |     | WIYWVGPIGGALAALIYEYM   |     |
| AtTIP4;1 |     | WVYWVGPLIGGGLAGFIYENV  |     |
| AtTIP5;1 |     | AVYWVGPLLGGATAALVYDNV  |     |

Helix 6 NIP

|          |     |                        |     |
|----------|-----|------------------------|-----|
| 1J4N     | 212 | WIFWVGPFIGAALAVLIYDFI  | 232 |
| 1FX8     | 234 | LVPLFGPIVGAIVGAFAYRKL  | 254 |
| 1RC2     | 206 | WFFWVVPVIVGGIIGGLIYRTL | 226 |
| 1Z98     | 243 | WIFWVGPFIGAAVAAAYHQYV  | 263 |
| 2B6O     | 202 | WVYWVGPVIGAGLGSLLYDFL  | 222 |
| 2F2B     | 223 | SIYVIGPIVGAVLAALTYQYL  | 243 |
| OsNIP1;1 |     | WVYIVGPVAGAVAGAWAYNII  |     |
| OsNIP1;2 |     | WVYVAAPVSGTVCGAWAYNLL  |     |
| OsNIP1;3 |     | WVYIAGPVFGAVAGAWAYNLI  |     |
| OsNIP1;4 |     | WVYILGPFAGAAAGAWAYSLLI |     |
| OsNIP1;5 |     | WVYVAAPVSGAVCGAWAYNLL  |     |
| OsNIP2;1 |     | WIYFLGPMGTLSGAWTYTFI   |     |
| OsNIP2;2 |     | WIYFLGPPVGTLSGAWVYTYI  |     |
| OsNIP3;1 |     | WIYLIAPTLGAVAGAVYTAV   |     |
| OsNIP3;2 |     | WVYLVATPLGAVAGEGFYFAI  |     |
| OsNIP3;3 |     | WVYLVATPLGAIAGTGAYVAI  |     |
| OsNIP3;4 |     | WVYMVSTPLGAIAGTGAYFAI  |     |
| OsNIP3;5 |     | WIYLVAPPLGAIAGAATYTLI  |     |
| OsNIP4;1 |     | WIYVVAPVAGMLVGALCNRAV  |     |
| ZmNIP1;1 |     | WVYVVGPPVVGAVAGAWAYNLI |     |
| ZmNIP2;1 |     | WIYFLGPPVGTLSGAWTYTYI  |     |
| ZmNIP2;2 |     | WIYFLGPPVGTLSGAWVYTYI  |     |
| ZmNIP3;1 |     | WIYLLAPTLGALAGASVYKAV  |     |
| AtNIP1;1 |     | WIYLVAPTLGAIAGAWVYNTV  |     |
| AtNIP1;2 |     | WIYIVSPIVGAVSGAWVYNMV  |     |
| AtNIP2;1 |     | WIYLLAPTLGAVSGALIHKML  |     |
| AtNIP3;1 |     | WLYIVSPVIGALSGAWTYGLL  |     |
| AtNIP4;1 |     | WVYIVGPPVVGVISGGFVYNLI |     |
| AtNIP4;2 |     | WVYIVGPPVVGIFAGGFVYNFM |     |
| AtNIP5;1 |     | WVYLVAPTLGAIAGAVYTGV   |     |
| AtNIP6;1 |     | WVYLTAPILGALIGAGTYTIV  |     |
| AtNIP7;1 |     | WIYMTAPVIGAIIGVLTYSI   |     |

Helix 6 SIP

|          |     |                        |     |
|----------|-----|------------------------|-----|
| 1J4N     | 212 | WIFWVGPFIGAALAVLIYDFI  | 232 |
| 1FX8     | 234 | LVPLFGPIVGAIVGAFAYRKL  | 254 |
| 1RC2     | 206 | WFFWVVPVIVGGIIGGLIYRTL | 226 |
| 1Z98     | 243 | WIFWVGPFIGAAVAAAYHQYV  | 263 |
| 2B6O     | 202 | WVYWVGPVIGAGLGSLLYDFL  | 222 |
| 2F2B     | 223 | SIYVIGPIVGAVLAALTYQYL  | 243 |
| OsSIP1;1 |     | YVYWICPFVGVAVLAAWVFRAV |     |
| OsSIP2;1 |     | LVYWLAPLQATLLGVVVTLL   |     |
| ZmSIP1;1 |     | YVYWICPFVIGAMLAGWIFRVV |     |
| ZmSIP1;2 |     | YVYWICPFVIGAILAAWIFRAM |     |
| ZmSIP2;1 |     | LVYWLAPLQATLLGVWAVTFF  |     |
| AtSIP1;1 |     | YVYWISSFVGALSAALLFRSI  |     |
| AtSIP1;2 |     | YVYWISSYTGAILSAMLFRII  |     |
| AtSIP2;1 |     | LVYWLGPVKATLLAVVWFFKVV |     |
