# Supplementary material for: Homology modeling of major intrinsic proteins in rice, maize and Arabidopsis: comparative analysis of transmembrane helix association and aromatic/arginine selectivity filters
Source: PubMed Central journal article supplement (PMC1866351; doi:10.1186/1472-6807-7-27), 2007-04-19
Supplement: 1472-6807-7-27-S7.pdf [file 1472-6807-7-27-S7.pdf]

## Structure-based sequence alignment of Loop B

LB PIP

|          |    |                    |     |
|----------|----|--------------------|-----|
| 1J4N     | 72 | ISGAHLNPAVTLGLLLS  | 88  |
| 1FX8     | 62 | VSGAHLNPAVTIALWLF  | 78  |
| 1RC2     | 57 | ISGGHFNPAVTIGLWAG  | 73  |
| 1Z98     | 95 | ISGGHINPAVTFGLFLA  | 111 |
| 2B6O     | 62 | ISGAHVNPAVTF AFLVG | 78  |
| 2F2B     | 76 | ISGCHINPAVTIGLWSV  | 92  |
| OsPIP1;1 |    | ISGGHINPAVTFGLFLA  |     |
| OsPIP1;2 |    | ISGGHINPAVTFGLFLA  |     |
| OsPIP1;3 |    | ISGGHINPAVTFGLFLA  |     |
| OsPIP2;1 |    | ISGGHINPAVTFGLFLA  |     |
| OsPIP2;2 |    | ISGGHINPAVTFGLFLA  |     |
| OsPIP2;3 |    | VSGGHINPAVTFGLFLA  |     |
| OsPIP2;4 |    | VSGGHINPAVTLGFLA   |     |
| OsPIP2;5 |    | ISGGHINPAVTFGLFLA  |     |
| OsPIP2;6 |    | ISGGHINPAVTFGLLLA  |     |
| OsPIP2;7 |    | VSGGHINPAVTLGLFFG  |     |
| OsPIP2;8 |    | ISGGHMNPAVTFAMVLA  |     |
| OsPIP1;4 |    | ISGRHINPAVTFGLFLA  |     |
| OsPIP1;5 |    | ISGGHINPAVTFGLFLA  |     |
| ZmPIP1;1 |    | ISG-HINPAVTFGLFLA  |     |
| ZmPIP1;2 |    | ISGGHINPAVTFGLFLA  |     |
| ZmPIP1;3 |    | ISGGHINPAVTFGLFLA  |     |
| ZmPIP1;4 |    | ISGGHINPAVTFGLFLA  |     |
| ZmPIP1;5 |    | ISGGHINPAVTFGLFLA  |     |
| ZmPIP1;6 |    | VSGGHINPAVTFGLLLA  |     |
| ZmPIP2;1 |    | ISGGHINPAVTFGLFLA  |     |
| ZmPIP2;2 |    | ISGGHINPAVTFGLFLA  |     |
| ZmPIP2;3 |    | ISGGHINPAVTFGLFLA  |     |
| ZmPIP2;4 |    | ISGGHINPAVTFGLFLA  |     |
| ZmPIP2;5 |    | VSGGHINPAVTFGLFLA  |     |
| ZmPIP2;6 |    | ISGGHINPAVTFGLFLA  |     |
| ZmPIP2;7 |    | ISGGHINPAVTFGLFLG  |     |
| AtPIP1;1 |    | ISGGHINPAVTFGLFLA  |     |
| AtPIP1;2 |    | ISGGHINPAVTFGLFLA  |     |
| AtPIP1;3 |    | ISGGHINPAVTFGLFLA  |     |
| AtPIP1;4 |    | ISGGHINPAVTFGLFLA  |     |
| AtPIP1;5 |    | ISGGHINPAVTFGLFLA  |     |
| AtPIP2;1 |    | ISGGHINPAVTFGLFLA  |     |
| AtPIP2;2 |    | ISGGHINPAVTFGLFLA  |     |
| AtPIP2;3 |    | ISGGHINPAVTFGLFLA  |     |
| AtPIP2;4 |    | ISGGHINPAVTVGLFLA  |     |
| AtPIP2;5 |    | ISGGHINPAVTFGLLLA  |     |
| AtPIP2;6 |    | ISGGHINPAVTFGLFLA  |     |
| AtPIP2;7 |    | ISGGHINPAVTFGLFLA  |     |
| AtPIP2;8 |    | ISGGHINPAVTFGLFLA  |     |

LB TIP

|          |    |                    |     |
|----------|----|--------------------|-----|
| 1J4N     | 72 | ISGAHLNPAVTLGLLLS  | 88  |
| 1FX8     | 62 | VSGAHLNPAVTIALWLF  | 78  |
| 1RC2     | 57 | ISGGHFNPAVTIGLWAG  | 73  |
| 1Z98     | 95 | ISGGHINPAVTFGLFLA  | 111 |
| 2B6O     | 62 | ISGAHVNPVTF AFLVG  | 78  |
| 2F2B     | 76 | ISGCHINPAVTIGLWSV  | 92  |
| OsTIP1;1 |    | ISGGHVNPVTFGAFVG   |     |
| OsTIP1;2 |    | ISGGHVNPVTFGAFVG   |     |
| OsTIP2;1 |    | ISGGHLNPAVTFGLAVG  |     |
| OsTIP2;2 |    | ISGGHVNPVTFGLALG   |     |
| OsTIP2;3 |    | ISGGHLNPVVTFGLAVG  |     |
| OsTIP3;1 |    | ISGGHVNPVITFGALLG  |     |
| OsTIP3;2 |    | ASGGHVNPVTFGVLVG   |     |
| OsTIP4;1 |    | VSGGHLNPAVTVALLAR  |     |
| OsTIP4;2 |    | VSGGHLNPAVTL SLAVG |     |
| OsTIP4;3 |    | VSGGHINPAVTLGLAAG  |     |
| OsTIP5;1 |    | VSGGHVNPVTFAYAIG   |     |
| ZmTIP1;1 |    | ISGGHVNPVTFGAFVG   |     |
| ZmTIP1;2 |    | ISGGHVNPVTFGAFVG   |     |
| ZmTIP2;1 |    | ISGGHLNPAVTFGLAVG  |     |
| ZmTIP2;2 |    | TSGGHLNPAVTFGLAVG  |     |
| ZmTIP2;3 |    | ISGGHLNPAVTFGLAVG  |     |
| ZmTIP3;1 |    | ISGGHVNPVTFGALVG   |     |
| ZmTIP4;1 |    | VSGGHLNPAVTVGLMVR  |     |
| ZmTIP4;2 |    | VSGGHLNPAVTVGILVR  |     |
| ZmTIP4;3 |    | ISGGHVNPVTL SLAVG  |     |
| ZmTIP4;4 |    | VSGGHINPAVTLGLAAT  |     |
| ZmTIP5;1 |    | VSGGHVNPVTFAYAIG   |     |
| AtTIP1;1 |    | ISGGHVNPVTFGAFIG   |     |
| AtTIP1;2 |    | ISGGHVNPVTFGVLLG   |     |
| AtTIP1;3 |    | VSGGHVNPVTFGAFIG   |     |
| AtTIP2;1 |    | ISGGHVNPVTFGLAVG   |     |
| AtTIP2;2 |    | ISGGHLNPAVTLGLAVG  |     |
| AtTIP2;3 |    | ISGGHLNPAVTLGLAIG  |     |
| AtTIP3;1 |    | VSGGHVNPVTFGALVG   |     |
| AtTIP3;2 |    | VSGGHVNPVTF AALIG  |     |
| AtTIP4;1 |    | ISGGHLNPAVTLGLLLG  |     |
| AtTIP5;1 |    | VSGGHVNPVTFAMAVA   |     |

## LB NIP

|          |    |                   |     |
|----------|----|-------------------|-----|
| 1J4N     | 72 | ISGAHLNPAVTLGLLLS | 88  |
| 1FX8     | 62 | VSGAHLNPAVTIALWLF | 78  |
| 1RC2     | 57 | ISGGHFNPAVTIGLWAG | 73  |
| 1Z98     | 95 | ISGGHINPAVTFGLFLA | 111 |
| 2B6O     | 62 | ISGAHVNPAVTFAFLVG | 78  |
| 2F2B     | 76 | ISGCHINPAVTIGLWSV | 92  |
| OsNIP1;1 |    | ISGAHFNPAVTLAF-AT |     |
| OsNIP1;2 |    | ISGAHFNPAVTVAFATC |     |
| OsNIP1;3 |    | ISGAHLNPAVTLAF-AT |     |
| OsNIP1;4 |    | VSGAHLNPAVTLGFAVA |     |
| OsNIP1;5 |    | ISGTHLNPAVTVAFATR |     |
| OsNIP2;1 |    | ISGAHMNPVTLAFAVF  |     |
| OsNIP2;2 |    | ISGAHMNPVTLSFADF  |     |
| OsNIP3;1 |    | ISGAHLNPSLTIAFAAL |     |
| OsNIP3;2 |    | ISGCHLNPAVSIAMTVF |     |
| OsNIP3;3 |    | ISGCHLNPAISIAMAVF |     |
| OsNIP3;4 |    | VSGAHINPAVSVAMAAF |     |
| OsNIP3;5 |    | ISGSHLNPAVSLAMAAL |     |
| OsNIP4;1 |    | LGPAHFNPAVTITFAAY |     |
| ZmNIP1;1 |    | ISGAHFNPVTLAFATS  |     |
| ZmNIP2;1 |    | ISGAHMNPVTLAFAVF  |     |
| ZmNIP2;2 |    | ISGAHMNPVTLSFACF  |     |
| ZmNIP3;1 |    | ISGAHLNPSLTIAFAAL |     |
| AtNIP1;1 |    | ISGAHINPAVTIAFASC |     |
| AtNIP1;2 |    | ISGAHFNPVTTIAF-AS |     |
| AtNIP2;1 |    | LS-AHFNPVTLALASS  |     |
| AtNIP3;1 |    | VSGAHFNPAVSIAFASS |     |
| AtNIP4;1 |    | ISGAHFNPVTVTFAIF  |     |
| AtNIP4;2 |    | ISGAHFNPVTVTFAVF  |     |
| AtNIP5;1 |    | ISGAHLNPSLTIAFAAL |     |
| AtNIP6;1 |    | ISGAHLNPAVTIAFAAL |     |
| AtNIP7;1 |    | ISGAHLNPSITIAFAVF |     |

## LB SIP

|          |    |                    |     |
|----------|----|--------------------|-----|
| 1J4N     | 72 | ISGAHLNPAVTLGLLLS  | 88  |
| 1FX8     | 62 | VSGAHLNPAVTIALWLF  | 78  |
| 1RC2     | 57 | ISGGHFNPAVTIGLWAG  | 73  |
| 1Z98     | 95 | ISGGHINPAVTFGLFLA  | 111 |
| 2B6O     | 62 | ISGAHVNPAVTFAFLVG  | 78  |
| 2F2B     | 76 | ISGCHINPAVTIGLWSV  | 92  |
| OsSIP1;1 |    | LGGASFNPOTALAAFHAA |     |
| OsSIP2;1 |    | TGGASYNPLTVLAGALA  |     |
| ZmSIP1;1 |    | LGGASFNPDTFAASYAA  |     |
| ZmSIP1;2 |    | LGGASFNP TGVAIFYAA |     |
| ZmSIP2;1 |    | SGGASYNPLTVLAAALA  |     |
| AtSIP1;1 |    | -GSASFNP TGSAIFYVA |     |
| AtSIP1;2 |    | LGGASFNP CGNAIFYTA |     |
| AtSIP2;1 |    | TKGGLYNPLTALAAGVS  |     |
