# Supplementary material for: Homology modeling of major intrinsic proteins in rice, maize and Arabidopsis: comparative analysis of transmembrane helix association and aromatic/arginine selectivity filters
Source: PubMed Central journal article supplement (PMC1866351; doi:10.1186/1472-6807-7-27), 2007-04-19
Supplement: 1472-6807-7-27-S8.pdf [file 1472-6807-7-27-S8.pdf]

## Structure-based sequence alignment of Loop E

LE PIP

|          |     |                                       |     |
|----------|-----|---------------------------------------|-----|
| 1J4N     | 188 | YTGC <b>G</b> INPAR <b>S</b> FGSSVIT  | 205 |
| 1FX8     | 197 | LTG <b>F</b> AMNPARDFGPKVFA           | 214 |
| 1RC2     | 180 | VTNTSVNPARSTAVAI-F                    | 196 |
| 1Z98     | 216 | ITGT <b>T</b> GINPAR <b>S</b> FGAAVIF | 233 |
| 2B6O     | 178 | YTG <b>A</b> GMNP <b>A</b> SFAPAILT   | 195 |
| 2F2B     | 193 | ISG <b>S</b> SLNP <b>A</b> RTFGPYLND  | 210 |
| OsPIP1;1 |     | ITGT <b>T</b> GINPAR <b>S</b> LGAAIIY |     |
| OsPIP1;2 |     | ITGT <b>T</b> GINPAR <b>S</b> LGAAIIY |     |
| OsPIP1;3 |     | ITGT <b>T</b> GINPAR <b>S</b> LGAAIVY |     |
| OsPIP2;1 |     | ITGT <b>T</b> GINPAR <b>S</b> IGAAVIF |     |
| OsPIP2;2 |     | ITGT <b>T</b> GINPAR <b>S</b> LGTAVIY |     |
| OsPIP2;3 |     | ITGT <b>T</b> GINPAR <b>S</b> LGAAVIY |     |
| OsPIP2;4 |     | ITGT <b>T</b> GINPAR <b>S</b> LGVAVVY |     |
| OsPIP2;5 |     | VTGT <b>T</b> GINPAR <b>S</b> LGAAVVY |     |
| OsPIP2;6 |     | ITGT <b>T</b> GINPAR <b>S</b> IGAAVIY |     |
| OsPIP2;7 |     | ITGT <b>T</b> GINPAR <b>S</b> LGAAVLY |     |
| OsPIP2;8 |     | ITGT <b>T</b> GINPAR <b>S</b> LGPAVLV |     |
| OsPIP1;4 |     | ITGT <b>T</b> GINPAR <b>S</b> LGAAIIY |     |
| OsPIP1;5 |     | ITGT <b>T</b> GINPRRTWGCHHLQ          |     |
| ZmPIP1;1 |     | ITGT <b>T</b> GINPAR <b>S</b> LGAAVIY |     |
| ZmPIP1;2 |     | ITGT <b>T</b> GINPAR <b>S</b> LGAAIIY |     |
| ZmPIP1;3 |     | ITGT <b>T</b> GINPAR <b>S</b> LGAAIIY |     |
| ZmPIP1;4 |     | ITGT <b>T</b> GINPAR <b>S</b> LGAAIIY |     |
| ZmPIP1;5 |     | ITGT <b>T</b> GINPAR <b>S</b> LGAAIVY |     |
| ZmPIP1;6 |     | ITGT <b>T</b> GINPAR <b>S</b> LGAAIIY |     |
| ZmPIP2;1 |     | VTGT <b>T</b> GINPAR <b>S</b> LGAAVIY |     |
| ZmPIP2;2 |     | VTGT <b>T</b> GINPAR <b>S</b> LGAAVVY |     |
| ZmPIP2;3 |     | ITGT <b>T</b> GINPAR <b>S</b> LGAAVIY |     |
| ZmPIP2;4 |     | ITGT <b>T</b> GINPAR <b>S</b> LGAAVIY |     |
| ZmPIP2;5 |     | ITGT <b>T</b> GINPAR <b>S</b> LGAAVIY |     |
| ZmPIP2;6 |     | ITGT <b>T</b> GINPAR <b>S</b> LGAAVVY |     |
| ZmPIP2;7 |     | VTGT <b>T</b> GINPAR <b>S</b> FGPAVIF |     |
| AtPIP1;1 |     | ITGT <b>T</b> GINPAR <b>S</b> LGAAIIY |     |
| AtPIP1;2 |     | ITGT <b>T</b> GINPAR <b>S</b> LGAAIIF |     |
| AtPIP1;3 |     | ITGT <b>T</b> GINPAR <b>S</b> LGAAIIY |     |
| AtPIP1;4 |     | ITGT <b>T</b> GINPAR <b>S</b> LGAAIIY |     |
| AtPIP1;5 |     | ITGT <b>T</b> GINPAR <b>S</b> LGAAIIY |     |
| AtPIP2;1 |     | ITGT <b>T</b> GINPAR <b>S</b> FGAAVIY |     |
| AtPIP2;2 |     | ITGT <b>T</b> GINPAR <b>S</b> FGAAVIY |     |
| AtPIP2;3 |     | ITGT <b>T</b> GINPAR <b>S</b> FGAAVIF |     |
| AtPIP2;4 |     | ITGT <b>T</b> GINPAR <b>S</b> FGAAVIY |     |
| AtPIP2;5 |     | ITGT <b>T</b> GINPAR <b>S</b> LGAAIIY |     |
| AtPIP2;6 |     | ITGT <b>T</b> GINPAR <b>S</b> FGAAVIY |     |
| AtPIP2;7 |     | ITGT <b>T</b> GINPAR <b>S</b> FGAAVIY |     |
| AtPIP2;8 |     | ITGT <b>T</b> GINPAR <b>S</b> FGAAVIY |     |

LE TIP

|          |     |                                     |     |
|----------|-----|-------------------------------------|-----|
| 1J4N     | 188 | YTG <b>C</b> GINPARSFGSSVIT         | 205 |
| 1FX8     | 197 | LTG <b>F</b> AMNPARDFGPKVFA         | 214 |
| 1RC2     | 180 | VTNTSVNPARSTAVAI-F                  | 196 |
| 1Z98     | 216 | ITGTGINPARSFGAAVIF                  | 233 |
| 2B6O     | 178 | YTG <b>A</b> GMNPARSFAPAILT         | 195 |
| 2F2B     | 193 | ISG <b>S</b> SLNPARTFGPYLND         | 210 |
| OsTIP1;1 |     | FDG <b>A</b> SMNPAVSFGPALVS         |     |
| OsTIP1;2 |     | FDG <b>A</b> SMNPAVSFGPAVVT         |     |
| OsTIP2;1 |     | FSG <b>G</b> SMNPARSFGPAVAA         |     |
| OsTIP2;2 |     | FSG <b>G</b> SMNPARSFGPAVAS         |     |
| OsTIP2;3 |     | FSG <b>S</b> SMNPARSFGPAVAA         |     |
| OsTIP3;1 |     | FDG <b>A</b> GMNPARVFGPALVG         |     |
| OsTIP3;2 |     | FDG <b>A</b> AMNPARAFGPALVG         |     |
| OsTIP4;1 |     | FSG <b>A</b> SMNPARSFGPALAT         |     |
| OsTIP4;2 |     | LTG <b>A</b> SMNPARSFGPALAT         |     |
| OsTIP4;3 |     | YSG <b>A</b> SMNPARSFGPALAA         |     |
| OsTIP5;1 |     | LTG <b>A</b> SMNPARSFGPAVVS         |     |
| ZmTIP1;1 |     | FDG <b>A</b> SMNPAVSFGPALVS         |     |
| ZmTIP1;2 |     | FDG <b>A</b> SMNPAVSFGPAVVT         |     |
| ZmTIP2;1 |     | FSG <b>G</b> SMNPARSFGPAVAA         |     |
| ZmTIP2;2 |     | FSG <b>G</b> SMNPARSFGPAVAA         |     |
| ZmTIP2;3 |     | FSG <b>G</b> SMNPARSFGPAVAA         |     |
| ZmTIP3;1 |     | FDG <b>A</b> GMNPARVFGPALVG         |     |
| ZmTIP4;1 |     | FTG <b>A</b> SMNPARSFGPALAT         |     |
| ZmTIP4;2 |     | FTG <b>A</b> SMNPARSFGPAMAT         |     |
| ZmTIP4;3 |     | LSG <b>A</b> SMNPARSFGPAVAS         |     |
| ZmTIP4;4 |     | FSG <b>A</b> SMNPARSFGPALVA         |     |
| ZmTIP5;1 |     | LTG <b>A</b> SMNPARSFGPAVVS         |     |
| AtTIP1;1 |     | FSG <b>A</b> SMNPAVAFGPVVS          |     |
| AtTIP1;2 |     | FSG <b>A</b> SMNPAVAFGPVVS          |     |
| AtTIP1;3 |     | FDG <b>A</b> SMNPAVSFGPAVVS         |     |
| AtTIP2;1 |     | FSG <b>G</b> SMNPARSFGPAVAA         |     |
| AtTIP2;2 |     | FSG <b>G</b> SMNPARSFGPAVVS         |     |
| AtTIP2;3 |     | FSG <b>G</b> SMNPARSFGPAVVS         |     |
| AtTIP3;1 |     | FSG <b>A</b> SMNPARAFGPALVG         |     |
| AtTIP3;2 |     | FDG <b>A</b> SMNPARAFGPALVG         |     |
| AtTIP4;1 |     | FSG <b>A</b> SMNPARSFGPALVS         |     |
| AtTIP5;1 |     | FSG <b>G</b> SMNP <b>C</b> AFGSAMVY |     |

LE NIP

|          |     |                              |     |
|----------|-----|------------------------------|-----|
| 1J4N     | 188 | YTG <b>CG</b> INPARSFGSSVIT  | 205 |
| 1FX8     | 197 | LTG <b>FAM</b> NPARDFGPKVFA  | 214 |
| 1RC2     | 180 | VTNTSVNPARSTAVAI-F           | 196 |
| 1Z98     | 216 | ITG <b>TG</b> INPARSFGAAVIF  | 233 |
| 2B6O     | 178 | YTG <b>AGM</b> NPARSFAPAILT  | 195 |
| 2F2B     | 193 | ISG <b>SSL</b> NPARTFGPYLND  | 210 |
| OsNIP1;1 |     | ISG <b>ASM</b> NPARSLGPAMIG  |     |
| OsNIP1;2 |     | VTG <b>ASM</b> NPARSLGPAMVA  |     |
| OsNIP1;3 |     | ISG <b>ASM</b> NPARTIGPAIIL  |     |
| OsNIP1;4 |     | VSG <b>ASM</b> NPARSIGPALVG  |     |
| OsNIP1;5 |     | VTG <b>ASM</b> NPARSLGPAMVA  |     |
| OsNIP2;1 |     | ISG <b>GSM</b> NPARTLGPALAS  |     |
| OsNIP2;2 |     | VSG <b>GSM</b> NPARTLAPAVAS  |     |
| OsNIP3;1 |     | TTG <b>GSM</b> NPVRTLGPAAVA  |     |
| OsNIP3;2 |     | STG <b>ASM</b> NPARTLGPAIAT  |     |
| OsNIP3;3 |     | STG <b>ASM</b> NPARTIGAAIAT  |     |
| OsNIP3;4 |     | STG <b>ASM</b> NPARTLGTAIVA  |     |
| OsNIP3;5 |     | STG <b>PSM</b> NPARTIGAAVAT  |     |
| OsNIP4;1 |     | VSG <b>GSM</b> NPARTLGPAILV  |     |
| ZmNIP1;1 |     | VSG <b>ASM</b> NPARSVGPALVS  |     |
| ZmNIP2;1 |     | VSG <b>GSM</b> NPARTLGPALAS  |     |
| ZmNIP2;2 |     | VSG <b>GSM</b> NPARTLAPAVAS  |     |
| ZmNIP3;1 |     | TTG <b>GSM</b> NPVRTLGPAAVA  |     |
| AtNIP1;1 |     | VSS <b>ASM</b> NPGRSLGPALVY  |     |
| AtNIP1;2 |     | VSG <b>ASM</b> NPGRSLGPAMVY  |     |
| AtNIP2;1 |     | VSG <b>ASM</b> NPARSIGPALVW  |     |
| AtNIP3;1 |     | ISG <b>ASM</b> NPARSLGPALIW  |     |
| AtNIP4;1 |     | ISG <b>ASM</b> NPARSLGPALVM  |     |
| AtNIP4;2 |     | ISG <b>ASM</b> NPARSLGPAIVM  |     |
| AtNIP5;1 |     | STG <b>GSM</b> NPVRTLGPAAVAS |     |
| AtNIP6;1 |     | ATS <b>ASM</b> NPVRTLGPAAIAA |     |
| AtNIP7;1 |     | ISG <b>GSM</b> NPARSLGPAAVVA |     |

LE SIP

|          |     |                              |     |
|----------|-----|------------------------------|-----|
| 1J4N     | 188 | YTG <b>CG</b> INPARSFGSSVIT  | 205 |
| 1FX8     | 197 | LTG <b>FAM</b> NPARDFGPKVFA  | 214 |
| 1RC2     | 180 | VTNTSVNPARSTAVAI-F           | 196 |
| 1Z98     | 216 | ITG <b>TG</b> INPARSFGAAVIF  | 233 |
| 2B6O     | 178 | YTG <b>AGM</b> NPARSFAPAILT  | 195 |
| 2F2B     | 193 | ISG <b>SSL</b> NPARTFGPYLND  | 210 |
| OsSIP1;1 |     | YTG <b>PSM</b> NPANAFGWAYVN  |     |
| OsSIP2;1 |     | ITG <b>GVM</b> NPASAFAWAYAR  |     |
| ZmSIP1;1 |     | YTG <b>PSM</b> NPANAFGWAYVN  |     |
| ZmSIP1;2 |     | YTG <b>PSM</b> NPANAFGWAYVN  |     |
| ZmSIP2;1 |     | ITG <b>GIM</b> NPASAFAWAYAR  |     |
| AtSIP1;1 |     | YTG <b>PAM</b> NPATIAFGWAYMY |     |
| AtSIP1;2 |     | FTR <b>PFM</b> NPATIAFGWAYIY |     |
| AtSIP2;1 |     | LTG <b>GCM</b> NPAAVMGWAYAR  |     |
